# Supplementary material for: MicroRNAs regulate the main events in rice drought stress response by manipulating the water supply to shoots
Source: Royal Society of Chemistry journal article supplement (doi:10.1039/c7mb00298j), 2017-08-17
Supplement: c7mb00298j1.zip [file c7mb00298j1.zip]

## Sheet: 1
Table S7- All detected Reads mapped to known miRNAs in our study.(All Reads that showed normalized count less than 10 TPM in all libraries were excluded.).
Name	Sequence	Length (nt)	Count WW	Count DD	Count WD	Normalized WW	Normalized DD	Normalized WD
osa-MIR1317	AGATTGCTTTCAAGGTCATTTCTT	24	34	35	5	16.6719	10.2982	4.07269
osa-MIR1317	GAAATGATCTTGGACGTAA	19	78	160	33	38.2473	47.0776	26.8797
osa-MIR1317	GAAATGATCTTGGACGTA	18	18	31	38	8.82629	9.12129	30.9524
osa-MIR1317	GAAATGATCTTGGACGTAAT	20	11	38	6	5.39385	11.1809	4.88722
osa-MIR1317	GAAATGATCTTGGACGTAATCTA	23	5	35	3	2.45175	10.2982	2.44361
osa-MIR1318	ATCAGGAGAGATGACACCGACA	22	1063	1836	364	521.242	540.216	296.492
osa-MIR1318	ATCAGGAGAGATGACACCGAC	21	162	335	62	79.4366	98.5688	50.5013
osa-MIR1318	TCAGGAGAGATGACACCGACA	21	648	855	246	317.747	251.571	200.376
osa-MIR1318	TCAGGAGAGATGACACCGAC	20	573	924	246	280.97	271.873	200.376
osa-MIR1320	TGGAACGGAGGAATTTTATAG	21	21	6	0	10.2973	1.76541	0
osa-MIR1423	GGAGGCAACTACACGTTGGGCGCT	24	114	237	102	55.8999	69.7338	83.0828
osa-MIR1423	GAGGCAACTACACGTTGGGCGCTC	24	36	53	15	17.6526	15.5945	12.2181
osa-MIR1423	AGGCAACTACACGTTGGGCGCTCG	24	44	76	46	21.5754	22.3619	37.4687
osa-MIR1423	GGCAACTACACGTTGGGCGCTCGA	24	48	165	41	23.5368	48.5488	33.396
osa-MIR1423	GGCAACTACACGTTGGGCGCTC	22	16	48	17	7.84559	14.1233	13.8471
osa-MIR1423	GCAACTACACGTTGGGCGCTCGAT	24	171	171	61	83.8498	50.3142	49.6868
osa-MIR1423	CAACTACACGTTGGGCGCTCGA	22	578	791	339	283.422	232.74	276.128
osa-MIR1423	CAACTACACGTTGGGCGCTCGAT	23	74	267	103	36.2859	78.5608	83.8973
osa-MIR1423	CAACTACACGTTGGGCGCTCGATCC	25	45	207	73	22.0657	60.9067	59.4612
osa-MIR1423	CAACTACACGTTGGGCGCTCGATC	24	36	212	49	17.6526	62.3779	39.9123
osa-MIR1423	ATCCAGGGGTGGGAAAATCGGGCG	24	19	88	23	9.31664	25.8927	18.7344
osa-MIR1423	ATCCAGGGGTGGGAAAATCGGGCGC	25	3	31	26	1.47105	9.12129	21.178
osa-MIR1423	TCCAGGGGTGGGAAAATCGGGCG	23	3	34	7	1.47105	10.004	5.70176
osa-MIR1423	CCAGGGGTGGGAAAATCGGG	20	10	37	13	4.9035	10.8867	10.589
osa-MIR1423	CCAGGGGTGGGAAAATCGGGC	21	6	25	15	2.9421	7.35588	12.2181
osa-MIR1423	CCAGGGGTGGGAAAATCGGGCG	22	4	77	17	1.9614	22.6561	13.8471
osa-MIR1423	ATCGAGCGCCCAAGCGGTAGTTGTC	25	40	31	14	19.614	9.12129	11.4035
osa-MIR1423	CGAGCGCCCAAGCGGTAGTTGTCT	24	8	53	3	3.9228	15.5945	2.44361
osa-MIR1423	AGCGCCCAAGCGGTAGTTGTCTCC	24	177	185	58	86.7919	54.4335	47.2432
osa-MIR1423	CCAGGGGTGGGAAAATCGGGCGC	23	0	31	14	0	9.12129	11.4035
osa-MIR1423	CCACCCCCGGATCGAGCGCCCAAG	24	0	106	7	0	31.1889	5.70176
osa-MIR1423b	GGAGGCAACTACACGTTGGGCGCT	24	114	237	102	55.8999	69.7338	83.0828
osa-MIR1423b	GAGGCAACTACACGTTGGGCGCTC	24	36	53	15	17.6526	15.5945	12.2181
osa-MIR1423b	AGGCAACTACACGTTGGGCGCTCG	24	44	76	46	21.5754	22.3619	37.4687
osa-MIR1423b	GGCAACTACACGTTGGGCGCTCGA	24	48	165	41	23.5368	48.5488	33.396
osa-MIR1423b	GGCAACTACACGTTGGGCGCTC	22	16	48	17	7.84559	14.1233	13.8471
osa-MIR1423b	GCAACTACACGTTGGGCGCTCGAT	24	171	171	61	83.8498	50.3142	49.6868
osa-MIR1423b	CAACTACACGTTGGGCGCTCGA	22	578	791	339	283.422	232.74	276.128
osa-MIR1423b	CAACTACACGTTGGGCGCTCGAT	23	74	267	103	36.2859	78.5608	83.8973
osa-MIR1423b	CAACTACACGTTGGGCGCTCGATCC	25	45	207	73	22.0657	60.9067	59.4612
osa-MIR1423b	CAACTACACGTTGGGCGCTCGATC	24	36	212	49	17.6526	62.3779	39.9123
osa-MIR1423b	ATCCAGGGGTGGGAAAATCGGGCG	24	19	88	23	9.31664	25.8927	18.7344
osa-MIR1423b	ATCCAGGGGTGGGAAAATCGGGCGC	25	3	31	26	1.47105	9.12129	21.178
osa-MIR1423b	TCCAGGGGTGGGAAAATCGGGCG	23	3	34	7	1.47105	10.004	5.70176
osa-MIR1423b	CCAGGGGTGGGAAAATCGGG	20	10	37	13	4.9035	10.8867	10.589
osa-MIR1423b	CCAGGGGTGGGAAAATCGGGC	21	6	25	15	2.9421	7.35588	12.2181
osa-MIR1423b	CCAGGGGTGGGAAAATCGGGCG	22	4	77	17	1.9614	22.6561	13.8471
osa-MIR1423b	ATCGAGCGCCCAAGCGGTAGTTGTC	25	40	31	14	19.614	9.12129	11.4035
osa-MIR1423b	CGAGCGCCCAAGCGGTAGTTGTCT	24	8	53	3	3.9228	15.5945	2.44361
osa-MIR1423b	AGCGCCCAAGCGGTAGTTGTCTCC	24	177	185	58	86.7919	54.4335	47.2432
osa-MIR1423b	CCAGGGGTGGGAAAATCGGGCGC	23	0	31	14	0	9.12129	11.4035
osa-MIR1423b	CCACCCCCGGATCGAGCGCCCAAG	24	0	106	7	0	31.1889	5.70176
osa-MIR1425	TAGGATTCAATCCTTGCTGCT	21	119	24	173	58.3516	7.06165	140.915
osa-MIR1425	CAGCAAGAACTGGATCTTAAT	21	40	58	8	19.614	17.0656	6.5163
osa-MIR1427	CCGTGCTGCGGAACCGTGCGGTGG	24	38	321	38	18.6333	94.4495	30.9524
osa-MIR1427	CGTGCTGCGGAACCGTGCGGT	21	30	123	21	14.7105	36.1909	17.1053
osa-MIR1427	CGTGCTGCGGAACCGTGCGGTG	22	16	68	15	7.84559	20.008	12.2181
osa-MIR1427	TGCGGAACCGTGCGGTGGCGC	21	45	135	47	22.0657	39.7218	38.2832
osa-MIR1428e	GTATGAACTGGGTACGCGATGA	22	162	13	21	79.4366	3.82506	17.1053
osa-MIR1428e	GTATGAACTGGGTACGCGATGATT	24	35	22	13	17.1622	6.47318	10.589
osa-MIR1428e	GTATGAACTGGGTACGCGATGAT	23	23	8	5	11.278	2.35388	4.07269
osa-MIR1428e	GTATGAACTGGGTACGCGATGATTT	25	22	15	2	10.7877	4.41353	1.62907
osa-MIR1429	GTAATATACTAATCCGTGCATCCA	24	90	74	4	44.1315	21.7734	3.25815
osa-MIR1432	ATCAGGAGAGATGACACCGACA	22	1063	1836	364	521.242	540.216	296.492
osa-MIR1432	ATCAGGAGAGATGACACCGAC	21	162	335	62	79.4366	98.5688	50.5013
osa-MIR1432	TCAGGAGAGATGACACCGACA	21	648	855	246	317.747	251.571	200.376
osa-MIR1432	TCAGGAGAGATGACACCGAC	20	573	924	246	280.97	271.873	200.376
osa-MIR1437	CGGGGAGGGAGGGAACGGTGC	21	57	128	19	27.9499	37.6621	15.4762
osa-MIR1437	GGGGAGGGAGGGAACGGTGCC	21	47	76	9	23.0464	22.3619	7.33083
osa-MIR1437	GAGGGAGGGAACGGTGCCTAG	21	55	73	23	26.9692	21.4792	18.7344
osa-MIR1437	AGGGAACGGTGCCTAGTGCGG	21	24	14	2	11.7684	4.11929	1.62907
osa-MIR1441	TTTTGGGTGTCACATCGGACGTTT	24	109	66	42	53.4481	19.4195	34.2106
osa-MIR1441	TTTGGGTGTCACATCGGACGTTT	23	58	19	12	28.4403	5.59047	9.77445
osa-MIR1441	ATCGGACGTTTAACCGGATGTCGG	24	7	41	7	3.43245	12.0636	5.70176
osa-MIR1441	TCGGACGTTTAACCGGATGTCGGA	24	13	66	15	6.37455	19.4195	12.2181
osa-MIR1441	CGGACGTTTAACCGGATGTCGGA	23	4	69	7	1.9614	20.3022	5.70176
osa-MIR1441	GGACGTTTAACCGGATGTCGGAA	23	8	46	10	3.9228	13.5348	8.14537
osa-MIR1441	CGGACGTTTAACCGGATGTCGGAA	24	0	38	4	0	11.1809	3.25815
osa-MIR156a	TGACAGAAGAGAGTGAGCAC	20	62163	145142	34273	30481.6	42705.9	27916.6
osa-MIR156a	TGACAGAAGAGAGTGAGCACA	21	616	957	167	302.055	281.583	136.028
osa-MIR156a	TGACAGAAGAGAGTGAGCA	19	312	1582	268	152.989	465.48	218.296
osa-MIR156a	GACAGAAGAGAGTGAGCAC	19	137	254	41	67.1779	74.7358	33.396
osa-MIR156a	GACAGAAGAGAGTGAGCACA	20	75	92	23	36.7762	27.0696	18.7344
osa-MIR156a	ACAGAAGAGAGTGAGCAC	18	33	46	15	16.1815	13.5348	12.2181
osa-MIR156b	CTGACAGAAGAGAGTGAGCAC	21	59	166	56	28.9306	48.8431	45.6141
osa-MIR156b	TGACAGAAGAGAGTGAGCAC	20	62163	145142	34273	30481.6	42705.9	27916.6
osa-MIR156b	TGACAGAAGAGAGTGAGCACA	21	616	957	167	302.055	281.583	136.028
osa-MIR156b	TGACAGAAGAGAGTGAGCA	19	312	1582	268	152.989	465.48	218.296
osa-MIR156b	GACAGAAGAGAGTGAGCAC	19	137	254	41	67.1779	74.7358	33.396
osa-MIR156b	GACAGAAGAGAGTGAGCACA	20	75	92	23	36.7762	27.0696	18.7344
osa-MIR156b	ACAGAAGAGAGTGAGCAC	18	33	46	15	16.1815	13.5348	12.2181
osa-MIR156c	CTGACAGAAGAGAGTGAGCAC	21	59	166	56	28.9306	48.8431	45.6141
osa-MIR156c	TGACAGAAGAGAGTGAGCAC	20	62163	145142	34273	30481.6	42705.9	27916.6
osa-MIR156c	TGACAGAAGAGAGTGAGCACA	21	616	957	167	302.055	281.583	136.028
osa-MIR156c	TGACAGAAGAGAGTGAGCA	19	312	1582	268	152.989	465.48	218.296
osa-MIR156c	GACAGAAGAGAGTGAGCAC	19	137	254	41	67.1779	74.7358	33.396
osa-MIR156c	GACAGAAGAGAGTGAGCACA	20	75	92	23	36.7762	27.0696	18.7344
osa-MIR156c	ACAGAAGAGAGTGAGCAC	18	33	46	15	16.1815	13.5348	12.2181
osa-MIR156d	ATTGACAGAAGAGAGTGAGCAC	22	248	209	61	121.607	61.4952	49.6868
osa-MIR156d	TTGACAGAAGAGAGTGAGCAC	21	103632	138090	20075	50815.9	40630.9	16351.8
osa-MIR156d	TTGACAGAAGAGAGTGAGCA	20	712	1701	214	349.129	500.494	174.311
osa-MIR156d	TTGACAGAAGAGAGTGAGCACA	22	69	90	19	33.8341	26.4812	15.4762
osa-MIR156d	TTGACAGAAGAGAGTGAGC	19	21	38	4	10.2973	11.1809	3.25815
osa-MIR156d	TGACAGAAGAGAGTGAGCAC	20	62163	145142	34273	30481.6	42705.9	27916.6
osa-MIR156d	TGACAGAAGAGAGTGAGCACA	21	616	957	167	302.055	281.583	136.028
osa-MIR156d	TGACAGAAGAGAGTGAGCA	19	312	1582	268	152.989	465.48	218.296
osa-MIR156d	GACAGAAGAGAGTGAGCAC	19	137	254	41	67.1779	74.7358	33.396
osa-MIR156d	GACAGAAGAGAGTGAGCACA	20	75	92	23	36.7762	27.0696	18.7344
osa-MIR156d	ACAGAAGAGAGTGAGCAC	18	33	46	15	16.1815	13.5348	12.2181
osa-MIR156d	GCTCACTCCTCTTTCTGTCACC	22	109	96	56	53.4481	28.2466	45.6141
osa-MIR156d	GCTCACTCCTCTTTCTGTCACCC	23	22	18	8	10.7877	5.29623	6.5163
osa-MIR156e	TGACAGAAGAGAGTGAGCAC	20	62163	145142	34273	30481.6	42705.9	27916.6
osa-MIR156e	TGACAGAAGAGAGTGAGCACA	21	616	957	167	302.055	281.583	136.028
osa-MIR156e	TGACAGAAGAGAGTGAGCA	19	312	1582	268	152.989	465.48	218.296
osa-MIR156e	GACAGAAGAGAGTGAGCAC	19	137	254	41	67.1779	74.7358	33.396
osa-MIR156e	GACAGAAGAGAGTGAGCACA	20	75	92	23	36.7762	27.0696	18.7344
osa-MIR156e	ACAGAAGAGAGTGAGCAC	18	33	46	15	16.1815	13.5348	12.2181
osa-MIR156f	TTGACAGAAGAGAGTGAGCAC	21	103632	138090	20075	50815.9	40630.9	16351.8
osa-MIR156f	TTGACAGAAGAGAGTGAGCA	20	712	1701	214	349.129	500.494	174.311
osa-MIR156f	TTGACAGAAGAGAGTGAGCACA	22	69	90	19	33.8341	26.4812	15.4762
osa-MIR156f	TTGACAGAAGAGAGTGAGC	19	21	38	4	10.2973	11.1809	3.25815
osa-MIR156f	TGACAGAAGAGAGTGAGCAC	20	62163	145142	34273	30481.6	42705.9	27916.6
osa-MIR156f	TGACAGAAGAGAGTGAGCACA	21	616	957	167	302.055	281.583	136.028
osa-MIR156f	TGACAGAAGAGAGTGAGCA	19	312	1582	268	152.989	465.48	218.296
osa-MIR156f	GACAGAAGAGAGTGAGCAC	19	137	254	41	67.1779	74.7358	33.396
osa-MIR156f	GACAGAAGAGAGTGAGCACA	20	75	92	23	36.7762	27.0696	18.7344
osa-MIR156f	ACAGAAGAGAGTGAGCAC	18	33	46	15	16.1815	13.5348	12.2181
osa-MIR156f	GCTCACTTCTCTTTCTGTCAGC	22	5	41	4	2.45175	12.0636	3.25815
osa-MIR156g	CTGACAGAAGAGAGTGAGCAC	21	59	166	56	28.9306	48.8431	45.6141
osa-MIR156g	TGACAGAAGAGAGTGAGCAC	20	62163	145142	34273	30481.6	42705.9	27916.6
osa-MIR156g	TGACAGAAGAGAGTGAGCACA	21	616	957	167	302.055	281.583	136.028
osa-MIR156g	TGACAGAAGAGAGTGAGCA	19	312	1582	268	152.989	465.48	218.296
osa-MIR156g	GACAGAAGAGAGTGAGCAC	19	137	254	41	67.1779	74.7358	33.396
osa-MIR156g	GACAGAAGAGAGTGAGCACA	20	75	92	23	36.7762	27.0696	18.7344
osa-MIR156g	ACAGAAGAGAGTGAGCAC	18	33	46	15	16.1815	13.5348	12.2181
osa-MIR156h	TTGACAGAAGAGAGTGAGCAC	21	103632	138090	20075	50815.9	40630.9	16351.8
osa-MIR156h	TTGACAGAAGAGAGTGAGCA	20	712	1701	214	349.129	500.494	174.311
osa-MIR156h	TTGACAGAAGAGAGTGAGCACA	22	69	90	19	33.8341	26.4812	15.4762
osa-MIR156h	TTGACAGAAGAGAGTGAGC	19	21	38	4	10.2973	11.1809	3.25815
osa-MIR156h	TGACAGAAGAGAGTGAGCAC	20	62163	145142	34273	30481.6	42705.9	27916.6
osa-MIR156h	TGACAGAAGAGAGTGAGCACA	21	616	957	167	302.055	281.583	136.028
osa-MIR156h	TGACAGAAGAGAGTGAGCA	19	312	1582	268	152.989	465.48	218.296
osa-MIR156h	GACAGAAGAGAGTGAGCAC	19	137	254	41	67.1779	74.7358	33.396
osa-MIR156h	GACAGAAGAGAGTGAGCACA	20	75	92	23	36.7762	27.0696	18.7344
osa-MIR156h	ACAGAAGAGAGTGAGCAC	18	33	46	15	16.1815	13.5348	12.2181
osa-MIR156h	TGCTCGCTCCTCTTTCTGTCAG	22	36	38	12	17.6526	11.1809	9.77445
osa-MIR156i	TGACAGAAGAGAGTGAGCAC	20	62163	145142	34273	30481.6	42705.9	27916.6
osa-MIR156i	TGACAGAAGAGAGTGAGCACA	21	616	957	167	302.055	281.583	136.028
osa-MIR156i	TGACAGAAGAGAGTGAGCA	19	312	1582	268	152.989	465.48	218.296
osa-MIR156i	GACAGAAGAGAGTGAGCAC	19	137	254	41	67.1779	74.7358	33.396
osa-MIR156i	GACAGAAGAGAGTGAGCACA	20	75	92	23	36.7762	27.0696	18.7344
osa-MIR156i	ACAGAAGAGAGTGAGCAC	18	33	46	15	16.1815	13.5348	12.2181
osa-MIR156j	TTGACAGAAGAGAGTGAGCAC	21	103632	138090	20075	50815.9	40630.9	16351.8
osa-MIR156j	TTGACAGAAGAGAGTGAGCA	20	712	1701	214	349.129	500.494	174.311
osa-MIR156j	TTGACAGAAGAGAGTGAGCACA	22	69	90	19	33.8341	26.4812	15.4762
osa-MIR156j	TTGACAGAAGAGAGTGAGC	19	21	38	4	10.2973	11.1809	3.25815
osa-MIR156j	TGACAGAAGAGAGTGAGCAC	20	62163	145142	34273	30481.6	42705.9	27916.6
osa-MIR156j	TGACAGAAGAGAGTGAGCACA	21	616	957	167	302.055	281.583	136.028
osa-MIR156j	TGACAGAAGAGAGTGAGCA	19	312	1582	268	152.989	465.48	218.296
osa-MIR156j	GACAGAAGAGAGTGAGCAC	19	137	254	41	67.1779	74.7358	33.396
osa-MIR156j	GACAGAAGAGAGTGAGCACA	20	75	92	23	36.7762	27.0696	18.7344
osa-MIR156j	ACAGAAGAGAGTGAGCAC	18	33	46	15	16.1815	13.5348	12.2181
osa-MIR156j	TGCTCGCTCCTCTTTCTGTCAG	22	36	38	12	17.6526	11.1809	9.77445
osa-MIR156k	TGACAGAAGAGAGAGAGCAC	20	200	303	75	98.0699	89.1533	61.0903
osa-MIR156l	GCTCACTTCTCTTTCTGTCAGC	22	5	41	4	2.45175	12.0636	3.25815
osa-MIR159a	TGAGCTCCTTTCGGTCCAAAA	21	20	14	13	9.80699	4.11929	10.589
osa-MIR159a	GAGCTCCTTTCGGTCCAAAAA	21	22	21	9	10.7877	6.17894	7.33083
osa-MIR159a	AGCTGCTGGGTCATGGATC	19	53	13	4	25.9885	3.82506	3.25815
osa-MIR159a	ATCAACCCTACATGGACCCTC	21	37	5	8	18.1429	1.47118	6.5163
osa-MIR159a	TTTGGATTGAAGGGAGCTCTG	21	4047	2323	992	1984.45	683.508	808.021
osa-MIR159a	TTTGGATTGAAGGGAGCT	18	462	637	432	226.542	187.428	351.88
osa-MIR159a	TTTGGATTGAAGGGAGCTCT	20	108	77	41	52.9578	22.6561	33.396
osa-MIR159a	TTTGGATTGAAGGGAGCTC	19	54	46	39	26.4789	13.5348	31.767
osa-MIR159a	TTGGATTGAAGGGAGCTCTG	20	49	22	19	24.0271	6.47318	15.4762
osa-MIR159a	TTGGATTGAAGGGAGCTCTGC	21	36	22	17	17.6526	6.47318	13.8471
osa-MIR159b	TTTGCATGACCAAGGAGCCGA	21	76	14	1	37.2666	4.11929	0.814537
osa-MIR159b	TTTGGATTGAAGGGAGCTCTG	21	4047	2323	992	1984.45	683.508	808.021
osa-MIR159b	TTTGGATTGAAGGGAGCT	18	462	637	432	226.542	187.428	351.88
osa-MIR159b	TTTGGATTGAAGGGAGCTCT	20	108	77	41	52.9578	22.6561	33.396
osa-MIR159b	TTTGGATTGAAGGGAGCTC	19	54	46	39	26.4789	13.5348	31.767
osa-MIR159b	TTGGATTGAAGGGAGCTCTG	20	49	22	19	24.0271	6.47318	15.4762
osa-MIR159b	TTGGATTGAAGGGAGCTCTGC	21	36	22	17	17.6526	6.47318	13.8471
osa-MIR159c	GGAGAGGAAGTGGTAGGATGC	21	24	11	1	11.7684	3.23659	0.814537
osa-MIR159c	TTTGCATGACCCGGGAGATGA	21	23	48	7	11.278	14.1233	5.70176
osa-MIR159e	GGAGAGGAAGTGGTAGGATGC	21	24	11	1	11.7684	3.23659	0.814537
osa-MIR159f	AGCTCCCTTCGATCCAATCC	20	11	23	23	5.39385	6.76741	18.7344
osa-MIR159f	GGAGAGGAAGTGGTAGGATGC	21	24	11	1	11.7684	3.23659	0.814537
osa-MIR159f	TTTGCATGACCCGGGAGATGA	21	23	48	7	11.278	14.1233	5.70176
osa-MIR159f	CTTGGATTGAAGGGAGCTCT	20	37	73	29	18.1429	21.4792	23.6216
osa-MIR160a	TGCCTGGCTCCCTGTATGCCA	21	66	9	47	32.3631	2.64812	38.2832
osa-MIR160a	GCGTGCAAGGAGCCAAGCATG	21	44	23	16	21.5754	6.76741	13.0326
osa-MIR160b	TGCCTGGCTCCCTGTATGCCA	21	66	9	47	32.3631	2.64812	38.2832
osa-MIR160b	GCGTGCAAGGAGCCAAGCATG	21	44	23	16	21.5754	6.76741	13.0326
osa-MIR160c	TGCCTGGCTCCCTGTATGCCA	21	66	9	47	32.3631	2.64812	38.2832
osa-MIR160c	TGATGGATGGCGTGCACGGAG	21	58	10	3	28.4403	2.94235	2.44361
osa-MIR160c	GCGTGCACGGAGCCAAGCATA	21	103	19	23	50.506	5.59047	18.7344
osa-MIR160d	TGCCTGGCTCCCTGTATGCCA	21	66	9	47	32.3631	2.64812	38.2832
osa-MIR160e	TGCCTGGCTCCCTGTATGCCG	21	70	7	25	34.3245	2.05965	20.3634
osa-MIR160f	TGCCTGGCTCCCTGAATGCCA	21	14	1	13	6.8649	0.294235	10.589
osa-MIR162a	TCGATAAACCTCTGCATCCAG	21	408	301	88	200.063	88.5648	71.6793
osa-MIR162b	TCGATAAGCCTCTGCATCCAG	21	192	123	29	94.1471	36.1909	23.6216
osa-MIR164a	TGGAGAAGCAGGGCACGTGCA	21	26035	4782	2025	12766.3	1407.03	1649.44
osa-MIR164a	TGGAGAAGCAGGGCACGTGC	20	120	42	21	58.842	12.3579	17.1053
osa-MIR164a	TGGAGAAGCAGGGCACGTGCAT	22	75	16	5	36.7762	4.70776	4.07269
osa-MIR164a	TGGAGAAGCAGGGCACGTG	19	60	31	15	29.421	9.12129	12.2181
osa-MIR164a	TGGAGAAGCAGGGCACGT	18	21	13	13	10.2973	3.82506	10.589
osa-MIR164a	GGAGAAGCAGGGCACGTGCA	20	40	7	3	19.614	2.05965	2.44361
osa-MIR164b	TGGAGAAGCAGGGCACGTGCA	21	26035	4782	2025	12766.3	1407.03	1649.44
osa-MIR164b	TGGAGAAGCAGGGCACGTGC	20	120	42	21	58.842	12.3579	17.1053
osa-MIR164b	TGGAGAAGCAGGGCACGTGCAT	22	75	16	5	36.7762	4.70776	4.07269
osa-MIR164b	TGGAGAAGCAGGGCACGTG	19	60	31	15	29.421	9.12129	12.2181
osa-MIR164b	TGGAGAAGCAGGGCACGT	18	21	13	13	10.2973	3.82506	10.589
osa-MIR164b	GGAGAAGCAGGGCACGTGCA	20	40	7	3	19.614	2.05965	2.44361
osa-MIR164b	AGGGCACGTGCATTACCATCC	21	65	3	7	31.8727	0.882706	5.70176
osa-MIR164d	TGCTGGAGAAGCAGGGCACGT	21	1107	485	111	542.817	142.704	90.4136
osa-MIR164d	TGCTGGAGAAGCAGGGCACGTGCT	24	21	7	2	10.2973	2.05965	1.62907
osa-MIR164d	TGGAGAAGCAGGGCACGTGCT	21	1364	242	104	668.837	71.2049	84.7119
osa-MIR164d	TGGAGAAGCAGGGCACGTGC	20	120	42	21	58.842	12.3579	17.1053
osa-MIR164d	TGGAGAAGCAGGGCACGTG	19	60	31	15	29.421	9.12129	12.2181
osa-MIR164d	TGGAGAAGCAGGGCACGT	18	21	13	13	10.2973	3.82506	10.589
osa-MIR164e	TGGAGAAGCAGGGCACGTG	19	60	31	15	29.421	9.12129	12.2181
osa-MIR164e	TGGAGAAGCAGGGCACGT	18	21	13	13	10.2973	3.82506	10.589
osa-MIR164e	TGGAGAAGCAGGGCACGTGAG	21	17	56	11	8.33594	16.4772	8.95991
osa-MIR164f	CGCGAGGTGGAGAAGCAGGGC	21	165	24	12	80.9077	7.06165	9.77445
osa-MIR164f	TGGAGAAGCAGGGCACGTGCA	21	26035	4782	2025	12766.3	1407.03	1649.44
osa-MIR164f	TGGAGAAGCAGGGCACGTGC	20	120	42	21	58.842	12.3579	17.1053
osa-MIR164f	TGGAGAAGCAGGGCACGTGCAT	22	75	16	5	36.7762	4.70776	4.07269
osa-MIR164f	TGGAGAAGCAGGGCACGTG	19	60	31	15	29.421	9.12129	12.2181
osa-MIR164f	TGGAGAAGCAGGGCACGT	18	21	13	13	10.2973	3.82506	10.589
osa-MIR164f	GGAGAAGCAGGGCACGTGCA	20	40	7	3	19.614	2.05965	2.44361
osa-MIR164f	CATGTGCCCTTCTTCTCCACC	21	41	11	4	20.1043	3.23659	3.25815
osa-MIR166a	ATCTCGGACCAGGCTTCATTCCCC	24	10	12	14	4.9035	3.53082	11.4035
osa-MIR166a	TCTCGGACCAGGCTTCATTCC	21	10927	4492	4459	5358.05	1321.7	3632.02
osa-MIR166a	TCTCGGACCAGGCTTCATTC	20	242	231	300	118.665	67.9683	244.361
osa-MIR166a	TCTCGGACCAGGCTTCATT	19	26	24	73	12.7491	7.06165	59.4612
osa-MIR166a	CTCGGACCAGGCTTCATTCCCC	22	47	44	25	23.0464	12.9464	20.3634
osa-MIR166a	CTCGGACCAGGCTTCATTCCC	21	25	20	10	12.2587	5.88471	8.14537
osa-MIR166a	CTCGGACCAGGCTTCATTCC	20	21	27	22	10.2973	7.94435	17.9198
osa-MIR166a	TCGGACCAGGCTTCATTCCCC	21	180750	103975	88335	88630.7	30593.1	71952.1
osa-MIR166a	TCGGACCAGGCTTCATTCCC	20	727	563	486	356.484	165.654	395.865
osa-MIR166a	TCGGACCAGGCTTCATTCC	19	650	456	629	318.727	134.171	512.344
osa-MIR166a	TCGGACCAGGCTTCATTC	18	285	204	398	139.75	60.024	324.186
osa-MIR166a	TCGGACCAGGCTTCATTCCCCT	22	217	139	105	106.406	40.8987	85.5264
osa-MIR166a	CGGACCAGGCTTCATTCCCC	20	495	507	514	242.723	149.177	418.672
osa-MIR166a	CGGACCAGGCTTCATTCCC	19	17	11	32	8.33594	3.23659	26.0652
osa-MIR166a	GGACCAGGCTTCATTCCCC	19	326	172	140	159.854	50.6085	114.035
osa-MIR166b	GGAATGTTGTCTGGCTCGGGG	21	206	60	24	101.012	17.6541	19.5489
osa-MIR166b	ATCTCGGACCAGGCTTCATTCCCC	24	10	12	14	4.9035	3.53082	11.4035
osa-MIR166b	TCTCGGACCAGGCTTCATTCC	21	10927	4492	4459	5358.05	1321.7	3632.02
osa-MIR166b	TCTCGGACCAGGCTTCATTC	20	242	231	300	118.665	67.9683	244.361
osa-MIR166b	TCTCGGACCAGGCTTCATT	19	26	24	73	12.7491	7.06165	59.4612
osa-MIR166b	CTCGGACCAGGCTTCATTCCCC	22	47	44	25	23.0464	12.9464	20.3634
osa-MIR166b	CTCGGACCAGGCTTCATTCCC	21	25	20	10	12.2587	5.88471	8.14537
osa-MIR166b	CTCGGACCAGGCTTCATTCC	20	21	27	22	10.2973	7.94435	17.9198
osa-MIR166b	TCGGACCAGGCTTCATTCCCC	21	180750	103975	88335	88630.7	30593.1	71952.1
osa-MIR166b	TCGGACCAGGCTTCATTCCC	20	727	563	486	356.484	165.654	395.865
osa-MIR166b	TCGGACCAGGCTTCATTCC	19	650	456	629	318.727	134.171	512.344
osa-MIR166b	TCGGACCAGGCTTCATTC	18	285	204	398	139.75	60.024	324.186
osa-MIR166b	TCGGACCAGGCTTCATTCCCCC	22	20	9	15	9.80699	2.64812	12.2181
osa-MIR166b	CGGACCAGGCTTCATTCCCC	20	495	507	514	242.723	149.177	418.672
osa-MIR166b	CGGACCAGGCTTCATTCCC	19	17	11	32	8.33594	3.23659	26.0652
osa-MIR166b	GGACCAGGCTTCATTCCCC	19	326	172	140	159.854	50.6085	114.035
osa-MIR166c	TTTCGGACCAGGCTTCATTCC	21	48	15	11	23.5368	4.41353	8.95991
osa-MIR166c	TTCGGACCAGGCTTCATTCCC	21	13603	9987	6131	6670.23	2938.53	4993.93
osa-MIR166c	TTCGGACCAGGCTTCATTCC	20	92	47	36	45.1122	13.8291	29.3233
osa-MIR166c	TTCGGACCAGGCTTCATTC	19	44	53	77	21.5754	15.5945	62.7194
osa-MIR166c	TCGGACCAGGCTTCATTCCCC	21	180750	103975	88335	88630.7	30593.1	71952.1
osa-MIR166c	TCGGACCAGGCTTCATTCCC	20	727	563	486	356.484	165.654	395.865
osa-MIR166c	TCGGACCAGGCTTCATTCC	19	650	456	629	318.727	134.171	512.344
osa-MIR166c	TCGGACCAGGCTTCATTC	18	285	204	398	139.75	60.024	324.186
osa-MIR166c	TCGGACCAGGCTTCATTCCCCC	22	20	9	15	9.80699	2.64812	12.2181
osa-MIR166c	CGGACCAGGCTTCATTCCCC	20	495	507	514	242.723	149.177	418.672
osa-MIR166c	CGGACCAGGCTTCATTCCC	19	17	11	32	8.33594	3.23659	26.0652
osa-MIR166c	GGACCAGGCTTCATTCCCC	19	326	172	140	159.854	50.6085	114.035
osa-MIR166d	GGAATGTTGTCTGGCTCGAGG	21	257	144	47	126.02	42.3699	38.2832
osa-MIR166d	GGAATGTTGTCTGGCTCGAGGTGCA	25	49	70	93	24.0271	20.5965	75.752
osa-MIR166d	GGAATGTTGTCTGGCTCGAGGTGCATG	27	17	158	28	8.33594	46.4892	22.807
osa-MIR166d	GGAATGTTGTCTGGCTCGAGGTGCAT	26	12	89	50	5.8842	26.1869	40.7269
osa-MIR166d	GGAATGTTGTCTGGCTCGAG	20	8	34	5	3.9228	10.004	4.07269
osa-MIR166d	GGAATGTTGTCTGGCTCGAGGTGC	24	6	5	30	2.9421	1.47118	24.4361
osa-MIR166d	ATCTCGGACCAGGCTTCATTCCCC	24	10	12	14	4.9035	3.53082	11.4035
osa-MIR166d	TCTCGGACCAGGCTTCATTCC	21	10927	4492	4459	5358.05	1321.7	3632.02
osa-MIR166d	TCTCGGACCAGGCTTCATTC	20	242	231	300	118.665	67.9683	244.361
osa-MIR166d	TCTCGGACCAGGCTTCATT	19	26	24	73	12.7491	7.06165	59.4612
osa-MIR166d	CTCGGACCAGGCTTCATTCCCC	22	47	44	25	23.0464	12.9464	20.3634
osa-MIR166d	CTCGGACCAGGCTTCATTCCC	21	25	20	10	12.2587	5.88471	8.14537
osa-MIR166d	CTCGGACCAGGCTTCATTCC	20	21	27	22	10.2973	7.94435	17.9198
osa-MIR166d	TCGGACCAGGCTTCATTCCCC	21	180750	103975	88335	88630.7	30593.1	71952.1
osa-MIR166d	TCGGACCAGGCTTCATTCCC	20	727	563	486	356.484	165.654	395.865
osa-MIR166d	TCGGACCAGGCTTCATTCC	19	650	456	629	318.727	134.171	512.344
osa-MIR166d	TCGGACCAGGCTTCATTC	18	285	204	398	139.75	60.024	324.186
osa-MIR166d	TCGGACCAGGCTTCATTCCCCT	22	217	139	105	106.406	40.8987	85.5264
osa-MIR166d	CGGACCAGGCTTCATTCCCC	20	495	507	514	242.723	149.177	418.672
osa-MIR166d	CGGACCAGGCTTCATTCCC	19	17	11	32	8.33594	3.23659	26.0652
osa-MIR166d	GGACCAGGCTTCATTCCCC	19	326	172	140	159.854	50.6085	114.035
osa-MIR166e	TCGAACCAGGCTTCATTCCCC	21	119	40	40	58.3516	11.7694	32.5815
osa-MIR166f	TCTCGGACCAGGCTTCATTCC	21	10927	4492	4459	5358.05	1321.7	3632.02
osa-MIR166f	TCTCGGACCAGGCTTCATTC	20	242	231	300	118.665	67.9683	244.361
osa-MIR166f	TCTCGGACCAGGCTTCATT	19	26	24	73	12.7491	7.06165	59.4612
osa-MIR166f	CTCGGACCAGGCTTCATTCCCC	22	47	44	25	23.0464	12.9464	20.3634
osa-MIR166f	CTCGGACCAGGCTTCATTCCC	21	25	20	10	12.2587	5.88471	8.14537
osa-MIR166f	CTCGGACCAGGCTTCATTCC	20	21	27	22	10.2973	7.94435	17.9198
osa-MIR166f	TCGGACCAGGCTTCATTCCCC	21	180750	103975	88335	88630.7	30593.1	71952.1
osa-MIR166f	TCGGACCAGGCTTCATTCCC	20	727	563	486	356.484	165.654	395.865
osa-MIR166f	TCGGACCAGGCTTCATTCC	19	650	456	629	318.727	134.171	512.344
osa-MIR166f	TCGGACCAGGCTTCATTC	18	285	204	398	139.75	60.024	324.186
osa-MIR166f	TCGGACCAGGCTTCATTCCCCT	22	217	139	105	106.406	40.8987	85.5264
osa-MIR166f	CGGACCAGGCTTCATTCCCC	20	495	507	514	242.723	149.177	418.672
osa-MIR166f	CGGACCAGGCTTCATTCCC	19	17	11	32	8.33594	3.23659	26.0652
osa-MIR166f	GGACCAGGCTTCATTCCCC	19	326	172	140	159.854	50.6085	114.035
osa-MIR166g	TCTCGGACCAGGCTTCATTCC	21	10927	4492	4459	5358.05	1321.7	3632.02
osa-MIR166g	TCTCGGACCAGGCTTCATTC	20	242	231	300	118.665	67.9683	244.361
osa-MIR166g	TCTCGGACCAGGCTTCATTCCT	22	36	14	8	17.6526	4.11929	6.5163
osa-MIR166g	TCTCGGACCAGGCTTCATT	19	26	24	73	12.7491	7.06165	59.4612
osa-MIR166g	CTCGGACCAGGCTTCATTCC	20	21	27	22	10.2973	7.94435	17.9198
osa-MIR166g	TCGGACCAGGCTTCATTCCTC	21	45365	21972	19529	22244.7	6464.94	15907.1
osa-MIR166g	TCGGACCAGGCTTCATTCCT	20	798	777	589	391.299	228.621	479.762
osa-MIR166g	TCGGACCAGGCTTCATTCC	19	650	456	629	318.727	134.171	512.344
osa-MIR166g	TCGGACCAGGCTTCATTC	18	285	204	398	139.75	60.024	324.186
osa-MIR166g	TCGGACCAGGCTTCATTCCTCA	22	29	16	25	14.2201	4.70776	20.3634
osa-MIR166g	CGGACCAGGCTTCATTCCTC	20	126	118	124	61.7841	34.7198	101.003
osa-MIR166g	GGACCAGGCTTCATTCCTC	19	61	21	26	29.9113	6.17894	21.178
osa-MIR166h	GGAATGTTGGCTGGCTCGAGG	21	136	4	3	66.6876	1.17694	2.44361
osa-MIR166h	TCGGACCAGGCTTCATTCCTC	21	45365	21972	19529	22244.7	6464.94	15907.1
osa-MIR166h	TCGGACCAGGCTTCATTCCT	20	798	777	589	391.299	228.621	479.762
osa-MIR166h	TCGGACCAGGCTTCATTCC	19	650	456	629	318.727	134.171	512.344
osa-MIR166h	TCGGACCAGGCTTCATTC	18	285	204	398	139.75	60.024	324.186
osa-MIR166h	CGGACCAGGCTTCATTCCTC	20	126	118	124	61.7841	34.7198	101.003
osa-MIR166h	GGACCAGGCTTCATTCCTC	19	61	21	26	29.9113	6.17894	21.178
osa-MIR166i	TCTCGGATCAGGCTTCATTCC	21	1007	317	196	493.782	93.2726	159.649
osa-MIR166i	TCGGATCAGGCTTCATTCCTC	21	72	23	28	35.3052	6.76741	22.807
osa-MIR166j	TCTCGGATCAGGCTTCATTCC	21	1007	317	196	493.782	93.2726	159.649
osa-MIR166j	TCGGATCAGGCTTCATTCCTC	21	72	23	28	35.3052	6.76741	22.807
osa-MIR166k	GGTTTGTTGTCTGGCTCGAGG	21	73	1	3	35.7955	0.294235	2.44361
osa-MIR166k	TCGGACCAGGCTTCAATCCCT	21	29183	21375	13343	14309.9	6289.28	10868.4
osa-MIR166k	TCGGACCAGGCTTCAATCCC	20	339	339	228	166.229	99.7458	185.714
osa-MIR166k	TCGGACCAGGCTTCAATCCCTT	22	127	81	58	62.2744	23.8331	47.2432
osa-MIR166k	TCGGACCAGGCTTCAATCC	19	37	27	55	18.1429	7.94435	44.7995
osa-MIR166k	TCGGACCAGGCTTCAATC	18	15	15	13	7.35525	4.41353	10.589
osa-MIR166k	CGGACCAGGCTTCAATCCCT	20	71	93	59	34.8148	27.3639	48.0577
osa-MIR166k	GGACCAGGCTTCAATCCCT	19	34	28	13	16.6719	8.23859	10.589
osa-MIR166l	TCTCGGACCAGGCTTCAATCCC	22	143	56	58	70.12	16.4772	47.2432
osa-MIR166l	TCGGACCAGGCTTCAATCCCT	21	29183	21375	13343	14309.9	6289.28	10868.4
osa-MIR166l	TCGGACCAGGCTTCAATCCC	20	339	339	228	166.229	99.7458	185.714
osa-MIR166l	TCGGACCAGGCTTCAATCCCTT	22	127	81	58	62.2744	23.8331	47.2432
osa-MIR166l	TCGGACCAGGCTTCAATCC	19	37	27	55	18.1429	7.94435	44.7995
osa-MIR166l	TCGGACCAGGCTTCAATC	18	15	15	13	7.35525	4.41353	10.589
osa-MIR166l	CGGACCAGGCTTCAATCCCT	20	71	93	59	34.8148	27.3639	48.0577
osa-MIR166l	GGACCAGGCTTCAATCCCT	19	34	28	13	16.6719	8.23859	10.589
osa-MIR166m	CTCGGACCAGGCTTCATTCCC	21	25	20	10	12.2587	5.88471	8.14537
osa-MIR166m	CTCGGACCAGGCTTCATTCC	20	21	27	22	10.2973	7.94435	17.9198
osa-MIR166m	TCGGACCAGGCTTCATTCCCT	21	816	399	295	400.125	117.4	240.288
osa-MIR166m	TCGGACCAGGCTTCATTCCC	20	727	563	486	356.484	165.654	395.865
osa-MIR166m	TCGGACCAGGCTTCATTCC	19	650	456	629	318.727	134.171	512.344
osa-MIR166m	TCGGACCAGGCTTCATTC	18	285	204	398	139.75	60.024	324.186
osa-MIR166m	TCGGACCAGGCTTCATTCCCTT	22	68	65	47	33.3438	19.1253	38.2832
osa-MIR166m	CGGACCAGGCTTCATTCCC	19	17	11	32	8.33594	3.23659	26.0652
osa-MIR166n	TTCGGACCAGGCTTCATTCCC	21	13603	9987	6131	6670.23	2938.53	4993.93
osa-MIR166n	TTCGGACCAGGCTTCATTCC	20	92	47	36	45.1122	13.8291	29.3233
osa-MIR166n	TTCGGACCAGGCTTCATTC	19	44	53	77	21.5754	15.5945	62.7194
osa-MIR166n	TCGGACCAGGCTTCATTCCCC	21	180750	103975	88335	88630.7	30593.1	71952.1
osa-MIR166n	TCGGACCAGGCTTCATTCCC	20	727	563	486	356.484	165.654	395.865
osa-MIR166n	TCGGACCAGGCTTCATTCC	19	650	456	629	318.727	134.171	512.344
osa-MIR166n	TCGGACCAGGCTTCATTC	18	285	204	398	139.75	60.024	324.186
osa-MIR166n	TCGGACCAGGCTTCATTCCCCA	22	210	175	130	102.973	51.4912	105.89
osa-MIR166n	CGGACCAGGCTTCATTCCCC	20	495	507	514	242.723	149.177	418.672
osa-MIR166n	CGGACCAGGCTTCATTCCC	19	17	11	32	8.33594	3.23659	26.0652
osa-MIR166n	GGACCAGGCTTCATTCCCC	19	326	172	140	159.854	50.6085	114.035
osa-MIR167a	TGAAGCTGCCAGCATGATCTA	21	19025	7939	2110	9328.9	2335.93	1718.67
osa-MIR167a	TGAAGCTGCCAGCATGATCT	20	507	256	64	248.607	75.3242	52.1304
osa-MIR167a	TGAAGCTGCCAGCATGATC	19	71	34	13	34.8148	10.004	10.589
osa-MIR167a	TGAAGCTGCCAGCATGATCTAG	22	24	14	0	11.7684	4.11929	0
osa-MIR167a	GATCATGCATGACAGCCTCATT	22	48	0	2	23.5368	0	1.62907
osa-MIR167a	ATCATGCATGACAGCCTCATT	21	31	4	5	15.2008	1.17694	4.07269
osa-MIR167b	TGAAGCTGCCAGCATGATCTA	21	19025	7939	2110	9328.9	2335.93	1718.67
osa-MIR167b	TGAAGCTGCCAGCATGATCT	20	507	256	64	248.607	75.3242	52.1304
osa-MIR167b	TGAAGCTGCCAGCATGATC	19	71	34	13	34.8148	10.004	10.589
osa-MIR167b	TGAAGCTGCCAGCATGATCTAA	22	25	14	5	12.2587	4.11929	4.07269
osa-MIR167c	TGAAGCTGCCAGCATGATCTA	21	19025	7939	2110	9328.9	2335.93	1718.67
osa-MIR167c	TGAAGCTGCCAGCATGATCT	20	507	256	64	248.607	75.3242	52.1304
osa-MIR167c	TGAAGCTGCCAGCATGATC	19	71	34	13	34.8148	10.004	10.589
osa-MIR167c	TGAAGCTGCCAGCATGATCTAG	22	24	14	0	11.7684	4.11929	0
osa-MIR167d	TGAAGCTGCCAGCATGATCTGA	22	87361	34328	8328	42837.4	10100.5	6783.47
osa-MIR167d	TGAAGCTGCCAGCATGATCTG	21	10725	2733	903	5259	804.145	735.527
osa-MIR167d	TGAAGCTGCCAGCATGATCT	20	507	256	64	248.607	75.3242	52.1304
osa-MIR167d	TGAAGCTGCCAGCATGATCTGAT	23	107	48	14	52.4674	14.1233	11.4035
osa-MIR167d	TGAAGCTGCCAGCATGATC	19	71	34	13	34.8148	10.004	10.589
osa-MIR167d	GAAGCTGCCAGCATGATCTGA	21	21	9	1	10.2973	2.64812	0.814537
osa-MIR167e	TGAAGCTGCCAGCATGATCTG	21	10725	2733	903	5259	804.145	735.527
osa-MIR167e	TGAAGCTGCCAGCATGATCT	20	507	256	64	248.607	75.3242	52.1304
osa-MIR167e	TGAAGCTGCCAGCATGATC	19	71	34	13	34.8148	10.004	10.589
osa-MIR167e	TGAAGCTGCCAGCATGATCTGG	22	61	17	8	29.9113	5.002	6.5163
osa-MIR167e	CAGATCATGTTGCAGCTTCAC	21	29	40	12	14.2201	11.7694	9.77445
osa-MIR167e	AGATCATGTTGCAGCTTCACT	21	833	337	237	408.461	99.1573	193.045
osa-MIR167e	AGATCATGTTGCAGCTTCAC	20	41	15	13	20.1043	4.41353	10.589
osa-MIR167f	TGAAGCTGCCAGCATGATCTGA	22	87361	34328	8328	42837.4	10100.5	6783.47
osa-MIR167f	TGAAGCTGCCAGCATGATCTG	21	10725	2733	903	5259	804.145	735.527
osa-MIR167f	TGAAGCTGCCAGCATGATCT	20	507	256	64	248.607	75.3242	52.1304
osa-MIR167f	TGAAGCTGCCAGCATGATCTGAT	23	107	48	14	52.4674	14.1233	11.4035
osa-MIR167f	TGAAGCTGCCAGCATGATC	19	71	34	13	34.8148	10.004	10.589
osa-MIR167f	GAAGCTGCCAGCATGATCTGA	21	21	9	1	10.2973	2.64812	0.814537
osa-MIR167f	AGATCATCTGGCAGTTTCATC	21	24	47	14	11.7684	13.8291	11.4035
osa-MIR167g	TGAAGCTGCCAGCATGATCTGA	22	87361	34328	8328	42837.4	10100.5	6783.47
osa-MIR167g	TGAAGCTGCCAGCATGATCTG	21	10725	2733	903	5259	804.145	735.527
osa-MIR167g	TGAAGCTGCCAGCATGATCTGAA	23	655	249	63	321.179	73.2646	51.3158
osa-MIR167g	TGAAGCTGCCAGCATGATCT	20	507	256	64	248.607	75.3242	52.1304
osa-MIR167g	TGAAGCTGCCAGCATGATCTGAAA	24	307	137	23	150.537	40.3102	18.7344
osa-MIR167g	TGAAGCTGCCAGCATGATC	19	71	34	13	34.8148	10.004	10.589
osa-MIR167g	GAAGCTGCCAGCATGATCTGA	21	21	9	1	10.2973	2.64812	0.814537
osa-MIR167g	AGATCATCCGGCAGCTTCATC	21	137	372	96	67.1779	109.456	78.1956
osa-MIR167g	TCATCCGGCAGCTTCATCTTC	21	259	208	61	127.001	61.2009	49.6868
osa-MIR167h	TGAAGCTGCCAGCATGATCTGA	22	87361	34328	8328	42837.4	10100.5	6783.47
osa-MIR167h	TGAAGCTGCCAGCATGATCTG	21	10725	2733	903	5259	804.145	735.527
osa-MIR167h	TGAAGCTGCCAGCATGATCT	20	507	256	64	248.607	75.3242	52.1304
osa-MIR167h	TGAAGCTGCCAGCATGATCTGAT	23	107	48	14	52.4674	14.1233	11.4035
osa-MIR167h	TGAAGCTGCCAGCATGATC	19	71	34	13	34.8148	10.004	10.589
osa-MIR167h	GAAGCTGCCAGCATGATCTGA	21	21	9	1	10.2973	2.64812	0.814537
osa-MIR167h	AGGTCATGCTGTAGTTTCATC	21	88	25	10	43.1508	7.35588	8.14537
osa-MIR167i	TGAAGCTGCCAGCATGATCTG	21	10725	2733	903	5259	804.145	735.527
osa-MIR167i	TGAAGCTGCCAGCATGATCT	20	507	256	64	248.607	75.3242	52.1304
osa-MIR167i	TGAAGCTGCCAGCATGATC	19	71	34	13	34.8148	10.004	10.589
osa-MIR167i	TGAAGCTGCCAGCATGATCTGG	22	61	17	8	29.9113	5.002	6.5163
osa-MIR167i	CAGATCATGTTGCAGCTTCAC	21	29	40	12	14.2201	11.7694	9.77445
osa-MIR167i	AGATCATGTTGCAGCTTCACT	21	833	337	237	408.461	99.1573	193.045
osa-MIR167i	AGATCATGTTGCAGCTTCAC	20	41	15	13	20.1043	4.41353	10.589
osa-MIR167j	TGAAGCTGCCAGCATGATCTGA	22	87361	34328	8328	42837.4	10100.5	6783.47
osa-MIR167j	TGAAGCTGCCAGCATGATCTG	21	10725	2733	903	5259	804.145	735.527
osa-MIR167j	TGAAGCTGCCAGCATGATCT	20	507	256	64	248.607	75.3242	52.1304
osa-MIR167j	TGAAGCTGCCAGCATGATCTGAT	23	107	48	14	52.4674	14.1233	11.4035
osa-MIR167j	TGAAGCTGCCAGCATGATC	19	71	34	13	34.8148	10.004	10.589
osa-MIR167j	GAAGCTGCCAGCATGATCTGA	21	21	9	1	10.2973	2.64812	0.814537
osa-MIR168a	CTCGCTTGGTGCAGATCGGGAC	22	39	65	29	19.1236	19.1253	23.6216
osa-MIR168a	TCGCTTGGTGCAGATCGGGAC	21	1264630	2655270	943566	620111	781274	768570
osa-MIR168a	TCGCTTGGTGCAGATCGGGACC	22	1155	7489	2441	566.354	2203.53	1988.29
osa-MIR168a	TCGCTTGGTGCAGATCGGGA	20	822	2192	544	403.067	644.964	443.108
osa-MIR168a	TCGCTTGGTGCAGATCGGG	19	48	79	27	23.5368	23.2446	21.9925
osa-MIR168a	TCGCTTGGTGCAGATCGGGACCCG	24	14	148	44	6.8649	43.5468	35.8396
osa-MIR168a	TCGCTTGGTGCAGATCGGGACCC	23	13	227	42	6.37455	66.7914	34.2106
osa-MIR168a	CGCTTGGTGCAGATCGGGAC	20	1386	6482	2214	679.625	1907.23	1803.39
osa-MIR168a	CGCTTGGTGCAGATCGGGACC	21	3	21	15	1.47105	6.17894	12.2181
osa-MIR168a	GCTTGGTGCAGATCGGGAC	19	1125	2023	6336	551.643	595.238	5160.91
osa-MIR168a	CTTGGTGCAGATCGGGAC	18	25	53	165	12.2587	15.5945	134.399
osa-MIR168a	TGGTGCAGATCGGGACCCGCC	21	57	342	127	27.9499	100.628	103.446
osa-MIR168a	GATCCCGCCTTGCACCAAGTGAAT	24	676	462	238	331.476	135.937	193.86
osa-MIR168a	GATCCCGCCTTGCACCAAGTGAA	23	25	16	12	12.2587	4.70776	9.77445
osa-MIR168a	ATCCCGCCTTGCACCAAGTGAAT	23	21	22	35	10.2973	6.47318	28.5088
osa-MIR168a	CCCGCCTTGCACCAAGTGAAT	21	704	725	289	345.206	213.321	235.401
osa-MIR168a	CCCGCCTTGCACCAAGTGAA	20	141	210	67	69.1393	61.7894	54.574
osa-MIR169a	CAGCCAAGGATGACTTGCCGA	21	12	36	6	5.8842	10.5925	4.88722
osa-MIR169a	AAGGATGACTTGCCGATCGATCGA	24	115	83	6	56.3902	24.4215	4.88722
osa-MIR169b	CAGCCAAGGATGACTTGCCGG	21	165	57	17	80.9077	16.7714	13.8471
osa-MIR169c	CAGCCAAGGATGACTTGCCGG	21	165	57	17	80.9077	16.7714	13.8471
osa-MIR171b	ACGGGATATTGGGGCGGTTCAATC	24	549	116	75	269.202	34.1313	61.0903
osa-MIR171b	ACGGGATATTGGGGCGGTTCAA	22	32	12	5	15.6912	3.53082	4.07269
osa-MIR171b	GGATATTGGGGCGGTTCAATC	21	22	1	3	10.7877	0.294235	2.44361
osa-MIR171b	TGATTGAGCCGTGCCAATATC	21	210	110	46	102.973	32.3659	37.4687
osa-MIR171c	GGATATTGGTGCGGTTCAATC	21	31	6	3	15.2008	1.76541	2.44361
osa-MIR171c	TGATTGAGCCGTGCCAATATC	21	210	110	46	102.973	32.3659	37.4687
osa-MIR171d	TGTTGGCCCGGCTCACTCAGA	21	21	4	2	10.2973	1.17694	1.62907
osa-MIR171d	TGATTGAGCCGTGCCAATATC	21	210	110	46	102.973	32.3659	37.4687
osa-MIR171e	TGATTGAGCCGTGCCAATATC	21	210	110	46	102.973	32.3659	37.4687
osa-MIR171f	TGATTGAGCCGTGCCAATATC	21	210	110	46	102.973	32.3659	37.4687
osa-MIR171i	AGGTATTGGCGTGCCTCAATC	21	26	2	0	12.7491	0.588471	0
osa-MIR171i	TCAATCCGAAGGCATGGCTGA	21	180	48	12	88.2629	14.1233	9.77445
osa-MIR171i	TTGAGCCGCGTCAATATCTCT	21	377	214	62	184.862	62.9663	50.5013
osa-MIR172a	AGAATCTTGATGATGCTGCAT	21	5859	5161	2197	2872.96	1518.55	1789.54
osa-MIR172a	AGAATCTTGATGATGCTGCA	20	52	79	61	25.4982	23.2446	49.6868
osa-MIR172d	GCAGCACCATCAAGATTCACA	21	436	107	76	213.792	31.4832	61.9048
osa-MIR172d	GCAGCACCATCAAGATTCAC	20	120	64	30	58.842	18.8311	24.4361
osa-MIR172d	AGAATCTTGATGATGCTGCAT	21	5859	5161	2197	2872.96	1518.55	1789.54
osa-MIR172d	AGAATCTTGATGATGCTGCA	20	52	79	61	25.4982	23.2446	49.6868
osa-MIR1846a	AGTGAGGAGGCCGGGGCCGCTGG	23	1	36	4	0.49035	10.5925	3.25815
osa-MIR1846a	AGTGAGGAGGCCGGGGCCGCTGGA	24	1	65	1	0.49035	19.1253	0.814537
osa-MIR1846b	AGTGAGGAGGCCGGGGCCGCTGG	23	1	36	4	0.49035	10.5925	3.25815
osa-MIR1846b	AGTGAGGAGGCCGGGGCCGCTGGA	24	1	65	1	0.49035	19.1253	0.814537
osa-MIR1846e	AACGAGGAGGCCGGGACCACCG	22	14	38	8	6.8649	11.1809	6.5163
osa-MIR1846e	AACGAGGAGGCCGGGACCACCGG	23	8	38	8	3.9228	11.1809	6.5163
osa-MIR1846e	CCGGTGACTCCGGCCTCCTCGCC	23	8	63	3	3.9228	18.5368	2.44361
osa-MIR1848	CCCCCTCGCCGGCGCGCGCGTGCA	24	2	38	11	0.980699	11.1809	8.95991
osa-MIR1848	CCCCCTCGCCGGCGCGCGCGTGCAG	25	1	111	11	0.49035	32.6601	8.95991
osa-MIR1848	CCTCGCCGGCGCGCGCGTGCAG	22	10	652	85	4.9035	191.841	69.2357
osa-MIR1848	CCTCGCCGGCGCGCGCGTGCAGG	23	7	245	27	3.43245	72.0876	21.9925
osa-MIR1848	CCTCGCCGGCGCGCGCGTGCA	21	2	54	38	0.980699	15.8887	30.9524
osa-MIR1848	CCTCGCCGGCGCGCGCGTGCAGGT	24	0	47	2	0	13.8291	1.62907
osa-MIR1848	TGTGCGCGCGGCCGTCGAGTGG	22	0	36	1	0	10.5925	0.814537
osa-MIR1849	AATGCCCTATCGTATCCTAGGTTG	24	28	24	7	13.7298	7.06165	5.70176
osa-MIR1850	TGGAAAGTTGGGAGATTGGGG	21	5229	1282	305	2564.04	377.21	248.434
osa-MIR1850	TGGAAAGTTGGGAGATTGGG	20	95	71	29	46.5832	20.8907	23.6216
osa-MIR1850	AAAGTTGGGAGATTGGGGGAA	21	23	5	2	11.278	1.47118	1.62907
osa-MIR1851	AGAGCTCGCCTGCGGCCATGG	21	21	27	13	10.2973	7.94435	10.589
osa-MIR1851	TCACGCGCGGGACGGAGGAAG	21	24	42	7	11.7684	12.3579	5.70176
osa-MIR1851	TCTGGGATGGCATTTTGGCGA	21	29	29	2	14.2201	8.53282	1.62907
osa-MIR1856	TATGCGTAAGACGGATTCGTA	21	56	74	9	27.4596	21.7734	7.33083
osa-MIR1856	AATCCGTCGGACGCATAGCTA	21	22	14	5	10.7877	4.11929	4.07269
osa-MIR1859	TTTCCTATGACGTCCATTCCAA	22	157	68	63	76.9849	20.008	51.3158
osa-MIR1860	ATCTGGAAGCTAGGTTTTCTCT	22	23	19	2	11.278	5.59047	1.62907
osa-MIR1861a	TGATCTTGAGGCAGAAACTGAG	22	26	4	1	12.7491	1.17694	0.814537
osa-MIR1861b	CGATCTTGAGGCAGGAACTGAG	22	333	218	101	163.286	64.1433	82.2683
osa-MIR1861b	CGATCTTGAGGCAGGAACTGA	21	38	24	22	18.6333	7.06165	17.9198
osa-MIR1861f	CGATCTTGAGGCAGGAACTGAG	22	333	218	101	163.286	64.1433	82.2683
osa-MIR1861f	CGATCTTGAGGCAGGAACTGA	21	38	24	22	18.6333	7.06165	17.9198
osa-MIR1861h	CGGTCTTGAGGCAGGAACTGAG	22	1760	1529	683	863.015	449.886	556.329
osa-MIR1861h	CGGTCTTGAGGCAGGAACTGA	21	456	572	342	223.599	168.303	278.572
osa-MIR1861h	CGGTCTTGAGGCAGGAACTG	20	15	62	12	7.35525	18.2426	9.77445
osa-MIR1861h	CGGTTCCTGTCCCAAGACTGAG	22	81	88	27	39.7183	25.8927	21.9925
osa-MIR1861i	CGATCTTGAGGCAGGAACTGAG	22	333	218	101	163.286	64.1433	82.2683
osa-MIR1861i	CGATCTTGAGGCAGGAACTGA	21	38	24	22	18.6333	7.06165	17.9198
osa-MIR1861j	CGGTCTTGAGGCAGGAACTGAG	22	1760	1529	683	863.015	449.886	556.329
osa-MIR1861j	CGGTCTTGAGGCAGGAACTGA	21	456	572	342	223.599	168.303	278.572
osa-MIR1861j	CGGTCTTGAGGCAGGAACTG	20	15	62	12	7.35525	18.2426	9.77445
osa-MIR1861l	CGATCTTGAGGCAGGAACTGAG	22	333	218	101	163.286	64.1433	82.2683
osa-MIR1861l	CGATCTTGAGGCAGGAACTGA	21	38	24	22	18.6333	7.06165	17.9198
osa-MIR1862a	AGTACGAGGTTGGTTTATTTTGGG	24	38	13	10	18.6333	3.82506	8.14537
osa-MIR1862a	GTACGAGGTTGGTTTATTTTGGGA	24	173	47	17	84.8305	13.8291	13.8471
osa-MIR1862a	TACGAGGTTGGTTTATTTTGGGAC	24	139	43	19	68.1586	12.6521	15.4762
osa-MIR1862a	ACGAGGTTGGTTTATTTTGGGACG	24	635	190	79	311.372	55.9047	64.3484
osa-MIR1862a	ACGAGGTTGGTTTATTTTG	19	86	61	29	42.1701	17.9484	23.6216
osa-MIR1862a	ACGAGGTTGGTTTATTTTGG	20	59	29	10	28.9306	8.53282	8.14537
osa-MIR1862a	ACGAGGTTGGTTTATTTTGGGA	22	36	4	6	17.6526	1.17694	4.88722
osa-MIR1862a	ACGAGGTTGGTTTATTTTGGG	21	28	21	6	13.7298	6.17894	4.88722
osa-MIR1862a	ACGAGGTTGGTTTATTTTGGGAC	23	22	10	4	10.7877	2.94235	3.25815
osa-MIR1862a	TTGGTTTATTTTGGGACGGAG	21	90	35	10	44.1315	10.2982	8.14537
osa-MIR1862b	GTACGAGGTTGGTTTATTTTGGGA	24	173	47	17	84.8305	13.8291	13.8471
osa-MIR1862b	TACGAGGTTGGTTTATTTTGGGAC	24	139	43	19	68.1586	12.6521	15.4762
osa-MIR1862b	ACGAGGTTGGTTTATTTTGGGACG	24	635	190	79	311.372	55.9047	64.3484
osa-MIR1862b	ACGAGGTTGGTTTATTTTG	19	86	61	29	42.1701	17.9484	23.6216
osa-MIR1862b	ACGAGGTTGGTTTATTTTGG	20	59	29	10	28.9306	8.53282	8.14537
osa-MIR1862b	ACGAGGTTGGTTTATTTTGGGA	22	36	4	6	17.6526	1.17694	4.88722
osa-MIR1862b	ACGAGGTTGGTTTATTTTGGG	21	28	21	6	13.7298	6.17894	4.88722
osa-MIR1862b	ACGAGGTTGGTTTATTTTGGGAC	23	22	10	4	10.7877	2.94235	3.25815
osa-MIR1862b	TTGGTTTATTTTGGGACGGAG	21	90	35	10	44.1315	10.2982	8.14537
osa-MIR1862c	AGTACGAGGTTGGTTTATTTTGGG	24	38	13	10	18.6333	3.82506	8.14537
osa-MIR1862c	GTACGAGGTTGGTTTATTTTGGGA	24	173	47	17	84.8305	13.8291	13.8471
osa-MIR1862c	TACGAGGTTGGTTTATTTTGGGAC	24	139	43	19	68.1586	12.6521	15.4762
osa-MIR1862c	ACGAGGTTGGTTTATTTTGGGACG	24	635	190	79	311.372	55.9047	64.3484
osa-MIR1862c	ACGAGGTTGGTTTATTTTG	19	86	61	29	42.1701	17.9484	23.6216
osa-MIR1862c	ACGAGGTTGGTTTATTTTGG	20	59	29	10	28.9306	8.53282	8.14537
osa-MIR1862c	ACGAGGTTGGTTTATTTTGGGA	22	36	4	6	17.6526	1.17694	4.88722
osa-MIR1862c	ACGAGGTTGGTTTATTTTGGG	21	28	21	6	13.7298	6.17894	4.88722
osa-MIR1862c	ACGAGGTTGGTTTATTTTGGGAC	23	22	10	4	10.7877	2.94235	3.25815
osa-MIR1862c	TTGGTTTATTTTGGGACGGAG	21	90	35	10	44.1315	10.2982	8.14537
osa-MIR1862d	ACTAGGTTTGTTTATTTTGGGACG	24	259	145	16	127.001	42.6641	13.0326
osa-MIR1862d	CTAGGTTTGTTTATTTTGGGACGG	24	427	416	93	209.379	122.402	75.752
osa-MIR1862d	TAGGTTTGTTTATTTTGGGACGGA	24	635	385	70	311.372	113.281	57.0176
osa-MIR1862d	TAGGTTTGTTTATTTTGGGACGG	23	86	87	20	42.1701	25.5985	16.2907
osa-MIR1862d	TAGGTTTGTTTATTTTGGGACG	22	81	25	1	39.7183	7.35588	0.814537
osa-MIR1862d	AGGTTTGTTTATTTTGGGACGGAG	24	366	320	160	179.468	94.1553	130.326
osa-MIR1862d	GGTTTGTTTATTTTGGGACGGAGG	24	402	237	111	197.121	69.7338	90.4136
osa-MIR1862d	GGTTTGTTTATTTTGGGACGGAG	23	32	28	5	15.6912	8.23859	4.07269
osa-MIR1862d	TGTTTATTTTGGGACGGAGGGAGT	24	88	361	35	43.1508	106.219	28.5088
osa-MIR1862e	ACTAGATTTGTTTATTTTGGGACG	24	158	170	13	77.4752	50.02	10.589
osa-MIR1862e	CTAGATTTGTTTATTTTGGGACGG	24	682	444	64	334.418	130.64	52.1304
osa-MIR1862e	AGATTTGTTTATTTTGGGACGGAG	24	169	82	23	82.8691	24.1273	18.7344
osa-MIR1862e	TGTTTATTTTGGGACGGAGGGAGT	24	88	361	35	43.1508	106.219	28.5088
osa-MIR1863	AGCTCTGATACCATGTTAGATTAG	24	320	538	44	156.912	158.299	35.8396
osa-MIR1863	AGCTCTGATACCATGTTAGATTA	23	112	326	106	54.9192	95.9207	86.3409
osa-MIR1863	AGCTCTGATACCATGTTAGATT	22	10	57	7	4.9035	16.7714	5.70176
osa-MIR1863b	TAGAGACTTGGCTGATGCATTACT	24	39	5	5	19.1236	1.47118	4.07269
osa-MIR1863b	AGAGACTTGGCTGATGCATTACTT	24	285	189	29	139.75	55.6105	23.6216
osa-MIR1863b	AGAGACTTGGCTGATGCATTACT	23	193	81	19	94.6375	23.8331	15.4762
osa-MIR1863c	TAGAAACTTGGCTGATGCATTACT	24	350	189	30	171.622	55.6105	24.4361
osa-MIR1864	ATTGTAGTAACGTGATGGTCAATG	24	22	63	2	10.7877	18.5368	1.62907
osa-MIR1864	TTGTAGTAACGTGATGGTCAATGT	24	127	407	87	62.2744	119.754	70.8647
osa-MIR1864	TTGTAGTAACGTGATGGTCAATG	23	5	41	8	2.45175	12.0636	6.5163
osa-MIR1865	TGCTAGTGATGGTGATTCTTCGAC	24	27	70	10	13.2394	20.5965	8.14537
osa-MIR1867	GTTTTTTTTCTAGGACAGAGGGAG	24	54	30	20	26.4789	8.82706	16.2907
osa-MIR1867	GTTTTTTTTCTAGGACAGAGGGAGT	25	40	26	29	19.614	7.65012	23.6216
osa-MIR1867	TTTTTTTTCTAGGACAGAGGGAGT	24	668	527	305	327.554	155.062	248.434
osa-MIR1867	TTTTTTTCTAGGACAGAGGGAGT	23	63	50	18	30.892	14.7118	14.6617
osa-MIR1867	TAGGACAGAGGGAGTAGATGT	21	72	50	4	35.3052	14.7118	3.25815
osa-MIR1868	AGCGTGCTCACGGAAAACGAGGGA	24	38	22	6	18.6333	6.47318	4.88722
osa-MIR1868	GCGTGCTCACGGAAAACGAGGGAG	24	160	104	40	78.4559	30.6005	32.5815
osa-MIR1868	TCACGGAAAACGAGGGAGCAGCCA	24	619	471	166	303.526	138.585	135.213
osa-MIR1868	CACGGAAAACGAGGGAGCAGCCAA	24	29	101	15	14.2201	29.7178	12.2181
osa-MIR1868	ACGGAAAACGAGGGAGCAGCCAAG	24	77	107	22	37.7569	31.4832	17.9198
osa-MIR1868	ACGGAAAACGAGGGAGCAGCCAA	23	13	56	5	6.37455	16.4772	4.07269
osa-MIR1870	ATGCTGAATTAGACCTAGTGGGCA	24	67	119	10	32.8534	35.014	8.14537
osa-MIR1870	TGCTGAATTAGACCTAGTGGGCAT	24	2137	7149	1223	1047.88	2103.49	996.179
osa-MIR1870	TGCTGAATTAGACCTAGTGGGCA	23	10	41	7	4.9035	12.0636	5.70176
osa-MIR1870	CTGAATTAGACCTAGTGGGCAT	22	25	10	5	12.2587	2.94235	4.07269
osa-MIR1870	ATTAGACCTAGTGGGCATTTATAC	24	97	82	22	47.5639	24.1273	17.9198
osa-MIR1870	AGTGGGCATTTATACATCACAACA	24	218	741	130	106.896	218.028	105.89
osa-MIR1870	AGTGGGCATTTATACATCACAACAC	25	47	181	31	23.0464	53.2566	25.2507
osa-MIR1870	TGGGCATTTATACATCACAACACA	24	38	58	5	18.6333	17.0656	4.07269
osa-MIR1871	ATGGCTCTGATATCATGTTGGTTT	24	42	63	8	20.5947	18.5368	6.5163
osa-MIR1873	ACCTCAACATGGTATCAGAGCTGG	24	44	47	16	21.5754	13.8291	13.0326
osa-MIR1873	TCAACATGGTATCAGAGCTGGAAG	24	701	1927	427	343.735	566.991	347.807
osa-MIR1873	TCAACATGGTATCAGAGCTGGA	22	93	127	45	45.6025	37.3679	36.6542
osa-MIR1873	TCAACATGGTATCAGAGCTGGAA	23	7	19	13	3.43245	5.59047	10.589
osa-MIR1873	ACATGGTATCAGAGCTGG	18	2	7	19	0.980699	2.05965	15.4762
osa-MIR1875	ACAATGGAGTGAAGTGCAACAGAA	24	32	26	6	15.6912	7.65012	4.88722
osa-MIR1876	ATAAGTGGGTTTGTGGGCTGGCCC	24	60	50	12	29.421	14.7118	9.77445
osa-MIR1878	ACTTAATCTGGACACTATAAAAGA	24	21	2	1	10.2973	0.588471	0.814537
osa-MIR1879	GTGTTTGGTTTAGGGATGAGGTGG	24	321	240	25	157.402	70.6165	20.3634
osa-MIR1879	TGTTTGGTTTAGGGATGAGGTGGG	24	15	47	4	7.35525	13.8291	3.25815
osa-MIR1879	TTTGGTTTAGGGATGAGGTGGG	22	24	43	7	11.7684	12.6521	5.70176
osa-MIR1879	TTGGTTTAGGGATGAGGTGGGATG	24	8	39	7	3.9228	11.4752	5.70176
osa-MIR1879	TGGTTTAGGGATGAGGTGGGATGG	24	30	148	13	14.7105	43.5468	10.589
osa-MIR1880	TTCCAAGCGGGCCACTTAAGCATT	24	50	96	40	24.5175	28.2466	32.5815
osa-MIR1880	TTCCAAGCGGGCCACTTAAGCAT	23	30	24	5	14.7105	7.06165	4.07269
osa-MIR1881	AATGTTATTGTAGCGTGGTGGTGT	24	102	26	8	50.0157	7.65012	6.5163
osa-MIR1882a	AGATTGCTTTCAAGGTCATTTCTT	24	34	35	5	16.6719	10.2982	4.07269
osa-MIR1882b	AGATTGCTTTCAAGGTCATTTCTT	24	34	35	5	16.6719	10.2982	4.07269
osa-MIR1882c	AGATTGCTTTCAAGGTCATTTCTT	24	34	35	5	16.6719	10.2982	4.07269
osa-MIR1882d	AGATTGCTTTCAAGGTCATTTCTT	24	34	35	5	16.6719	10.2982	4.07269
osa-MIR1882e	AGATTGCTTTCAAGGTCATTTCTT	24	34	35	5	16.6719	10.2982	4.07269
osa-MIR1882e	GAAATGATCTTGGACGTAA	19	78	160	33	38.2473	47.0776	26.8797
osa-MIR1882e	GAAATGATCTTGGACGTA	18	18	31	38	8.82629	9.12129	30.9524
osa-MIR1882e	GAAATGATCTTGGACGTAAT	20	11	38	6	5.39385	11.1809	4.88722
osa-MIR1882e	GAAATGATCTTGGACGTAATCTA	23	5	35	3	2.45175	10.2982	2.44361
osa-MIR1882f	AGATTGCTTTCAAGGTCATTTCTT	24	34	35	5	16.6719	10.2982	4.07269
osa-MIR1882g	AGATTGCTTTCAAGGTCATTTCTT	24	34	35	5	16.6719	10.2982	4.07269
osa-MIR1882h	AGATTGCTTTCAAGGTCATTTCTT	24	34	35	5	16.6719	10.2982	4.07269
osa-MIR1883a	TATCTAGTCACCTGTGACGGGCCG	24	27	24	13	13.2394	7.06165	10.589
osa-MIR1883a	ACCTGTGACGGGCCGAGAATGGAA	24	165	227	70	80.9077	66.7914	57.0176
osa-MIR1883a	CCTGTGACGGGCCGAGAATGGAAC	24	10	51	7	4.9035	15.006	5.70176
osa-MIR1883a	GGGTTCCATTCTCGATCCGTCACA	24	16	134	16	7.84559	39.4275	13.0326
osa-MIR1883a	GGGTTCCATTCTCGATCCGTCAC	23	1	36	1	0.49035	10.5925	0.814537
osa-MIR1883b	TATCTAGTCACCTGTGACGGGCCG	24	27	24	13	13.2394	7.06165	10.589
osa-MIR1883b	ACCTGTGACGGGCCGAGAATGGAA	24	165	227	70	80.9077	66.7914	57.0176
osa-MIR1883b	AGGTGACTAGATACCTGTGACGGG	24	282	254	20	138.279	74.7358	16.2907
osa-MIR1883b	GGTGACTAGATACCTGTGACGGGC	24	39	56	4	19.1236	16.4772	3.25815
osa-MIR1883b	GTGACTAGATACCTGTGACGGGCC	24	44	31	3	21.5754	9.12129	2.44361
osa-MIR1884a	TGTGACGCCGTTGACTTTTCAT	22	21	15	4	10.2973	4.41353	3.25815
osa-MIR1884a	GCAAAAAGTCAACGGTGTCATACA	24	23	15	0	11.278	4.41353	0
osa-MIR1884b	AAAGTCAACGGTGTCATATATTTA	24	1131	369	223	554.585	108.573	181.642
osa-MIR1884b	AATGTATGACGCTGTTGACTTTTA	24	72	93	14	35.3052	27.3639	11.4035
osa-MIR2055	TTTCCTTGGGAAGGTGGTTTC	21	25	14	3	12.2587	4.11929	2.44361
osa-MIR2106	TCTGGCCGAGGTTTTCTGGATACATTC	27	2	6	32	0.980699	1.76541	26.0652
osa-MIR2106	TCTGGCCGAGGTTTTCTGGATA	22	1	2	32	0.49035	0.588471	26.0652
osa-MIR2121a	ACGGAAAACGGAGCGGTCCATTA	23	34	36	16	16.6719	10.5925	13.0326
osa-MIR2121a	AAAACGGAGCGGTCCATTAGCGCG	24	66	56	21	32.3631	16.4772	17.1053
osa-MIR2121b	ACGGAAAACGGAGCGGTCCATTA	23	34	36	16	16.6719	10.5925	13.0326
osa-MIR2121b	AAAACGGAGCGGTCCATTAGCGCG	24	66	56	21	32.3631	16.4772	17.1053
osa-MIR2123a	TTTGACACCGTTGACTTTTT	20	22	20	0	10.7877	5.88471	0
osa-MIR2123a	TTTGACACCGTTGACTTTTTA	21	22	17	6	10.7877	5.002	4.88722
osa-MIR2123b	TTTGACACCGTTGACTTTTT	20	22	20	0	10.7877	5.88471	0
osa-MIR2123b	TTTGACACCGTTGACTTTTTA	21	22	17	6	10.7877	5.002	4.88722
osa-MIR2123c	TTGACTTTTTAGCACATGTTTGAC	24	26	21	10	12.7491	6.17894	8.14537
osa-MIR2123c	TGACTTTTTAGCACATGTTTGAC	23	21	17	4	10.2973	5.002	3.25815
osa-MIR2124a	ATGTTTGGACACATGCATG	19	3	3	14	1.47105	0.882706	11.4035
osa-MIR2124b	TTGGACACATGCATGGAGTATTA	23	17	5	13	8.33594	1.47118	10.589
osa-MIR2124e	ATGTTTGGACACATGCATG	19	3	3	14	1.47105	0.882706	11.4035
osa-MIR2124e	TGTTTGGACACATGCATGGAGTAT	24	18	35	12	8.82629	10.2982	9.77445
osa-MIR2124e	TTGGACACATGCATGGAGTATTA	23	17	5	13	8.33594	1.47118	10.589
osa-MIR2124h	ATCAAATGTTTGGACACATGCATG	24	25	25	22	12.2587	7.35588	17.9198
osa-MIR2124h	AAATGTTTGGACACATGCATG	21	8	15	16	3.9228	4.41353	13.0326
osa-MIR2124h	ATGTTTGGACACATGCATG	19	3	3	14	1.47105	0.882706	11.4035
osa-MIR2124h	TGTTTGGACACATGCATGGAGTAT	24	18	35	12	8.82629	10.2982	9.77445
osa-MIR2124h	TTGGACACATGCATGGAGTATTA	23	17	5	13	8.33594	1.47118	10.589
osa-MIR2125	TTCCAAGTAGGAAAATATGCTGAC	24	24	22	13	11.7684	6.47318	10.589
osa-MIR2125	CCAAGTAGGAAAATATGCTGACAT	24	36	30	9	17.6526	8.82706	7.33083
osa-MIR2125	AGTAGGAAAATATGCTGACATGGA	24	95	67	6	46.5832	19.7138	4.88722
osa-MIR2862	AACAGCTTAGATTCGTCCACGTCA	24	19	123	18	9.31664	36.1909	14.6617
osa-MIR2862	CGTGGACGAATCTCAGCCGTTGGA	24	1	35	2	0.49035	10.2982	1.62907
osa-MIR2862	TGGACGAATCTCAGCCGTTGGA	22	18	25	13	8.82629	7.35588	10.589
osa-MIR2866	TGCTGAGCACAAACTAGAGAA	21	21	20	3	10.2973	5.88471	2.44361
osa-MIR2867	ACGACCAGGACGTGTGGGATGGCA	24	53	47	26	25.9885	13.8291	21.178
osa-MIR2867	GACCAGGACGTGTGGGATGGCACA	24	28	39	11	13.7298	11.4752	8.95991
osa-MIR2867	CCAGGACGTGTGGGATGGCA	20	194	43	26	95.1278	12.6521	21.178
osa-MIR2867	CCAGGACGTGTGGGATGGCAC	21	38	25	13	18.6333	7.35588	10.589
osa-MIR2867	AGGACGTGTGGGATGGCACATGTT	24	40	170	43	19.614	50.02	35.0251
osa-MIR2869	TTGGGAGGTGGTGAGTACTAAG	22	126	99	18	61.7841	29.1293	14.6617
osa-MIR2871a	GACCGTAGAAACTAGCATAGAAAA	24	47	11	1	23.0464	3.23659	0.814537
osa-MIR2873	AAGTTTGGACTTAAATTTGGTAAC	24	76	239	12	37.2666	70.3222	9.77445
osa-MIR2873	AAGTTTGGACTTAAATTTGGTAA	23	18	44	8	8.82629	12.9464	6.5163
osa-MIR2873	AAGTTTGGACTTAAATTTGGTA	22	6	47	4	2.9421	13.8291	3.25815
osa-MIR2874	GAACTGTTCACATGTTGGTTCCCGG	25	30	41	5	14.7105	12.0636	4.07269
osa-MIR2878	TACATGTATAAAATTCTGAGGATG	24	25	28	3	12.2587	8.23859	2.44361
osa-MIR2878	ATGTATAAAATTCTGAGGATGTTA	24	30	21	4	14.7105	6.17894	3.25815
osa-MIR2880	ACGGTATCCCGTTCGGACAGGATG	24	14	68	14	6.8649	20.008	11.4035
osa-MIR319a	ACTGGATGACGCGGGAGCTAA	21	135	54	75	66.1972	15.8887	61.0903
osa-MIR319a	ACTGGATGACGCGGGAGCTAAA	22	26	16	14	12.7491	4.70776	11.4035
osa-MIR390	AAGCTCAGGAGGGATAGCGCC	21	936	309	140	458.967	90.9187	114.035
osa-MIR390	CGCTATCTATCCTGAGCTCCA	21	23	4	6	11.278	1.17694	4.88722
osa-MIR393	TCCAAAGGGATCGCATTGATC	21	54	61	20	26.4789	17.9484	16.2907
osa-MIR393b	TCCAAAGGGATCGCATTGATC	21	54	61	20	26.4789	17.9484	16.2907
osa-MIR393b	TCAGTGCAATCCCTTTGGAAT	21	72	21	8	35.3052	6.17894	6.5163
osa-MIR396c	TTCCACAGCTTTCTTGAACTT	21	155	62	16	76.0042	18.2426	13.0326
osa-MIR396c	AGAAGAGGGTCAAGAAAGCTGT	22	27	7	2	13.2394	2.05965	1.62907
osa-MIR396c	AGGGTCAAGAAAGCTGTGGGAAGA	24	77	14	3	37.7569	4.11929	2.44361
osa-MIR396c	GGTCAAGAAAGCTGTGGGAAG	21	276	70	37	135.337	20.5965	30.1379
osa-MIR396c	GGTCAAGAAAGCTGTGGGAAGA	22	27	8	2	13.2394	2.35388	1.62907
osa-MIR396c	GTCAAGAAAGCTGTGGGAAGA	21	42	18	3	20.5947	5.29623	2.44361
osa-MIR396c	AGAAAGCTGTGGGAAGAAATGGCA	24	975	867	110	478.091	255.102	89.5991
osa-MIR396c	AAGCTGTGGGAAGAAATGGCA	21	55	78	25	26.9692	22.9503	20.3634
osa-MIR396d	TCCACAGGCTTTCTTGAACTG	21	3328	2406	520	1631.88	707.93	423.559
osa-MIR396d	TCCACAGGCTTTCTTGAACT	20	69	66	21	33.8341	19.4195	17.1053
osa-MIR396d	TCCACAGGCTTTCTTGAA	18	56	59	17	27.4596	17.3599	13.8471
osa-MIR396d	TCCACAGGCTTTCTTGAAC	19	39	27	9	19.1236	7.94435	7.33083
osa-MIR396d	ACAGGCTTTCTTGAACTGTGA	21	127	188	70	62.2744	55.3162	57.0176
osa-MIR396e	TCCACAGGCTTTCTTGAACTG	21	3328	2406	520	1631.88	707.93	423.559
osa-MIR396e	TCCACAGGCTTTCTTGAACT	20	69	66	21	33.8341	19.4195	17.1053
osa-MIR396e	TCCACAGGCTTTCTTGAA	18	56	59	17	27.4596	17.3599	13.8471
osa-MIR396e	TCCACAGGCTTTCTTGAAC	19	39	27	9	19.1236	7.94435	7.33083
osa-MIR396e	ACAGGCTTTCTTGAACTGTGA	21	127	188	70	62.2744	55.3162	57.0176
osa-MIR396f	TCCACAGGCTTTCTTGAACTG	21	3328	2406	520	1631.88	707.93	423.559
osa-MIR396f	TCCACAGGCTTTCTTGAACT	20	69	66	21	33.8341	19.4195	17.1053
osa-MIR396f	TCCACAGGCTTTCTTGAA	18	56	59	17	27.4596	17.3599	13.8471
osa-MIR396f	TCCACAGGCTTTCTTGAAC	19	39	27	9	19.1236	7.94435	7.33083
osa-MIR396f	ACAGGCTTTCTTGAACTGTGA	21	127	188	70	62.2744	55.3162	57.0176
osa-MIR396g	TCCACAGGCTTTCTTGAA	18	56	59	17	27.4596	17.3599	13.8471
osa-MIR396g	TCCACAGGCTTTCTTGAAC	19	39	27	9	19.1236	7.94435	7.33083
osa-MIR396h	TCCACAGGCTTTCTTGAA	18	56	59	17	27.4596	17.3599	13.8471
osa-MIR396h	TCCACAGGCTTTCTTGAAC	19	39	27	9	19.1236	7.94435	7.33083
osa-MIR396i	TCCACAGGCTTTCTTGAA	18	56	59	17	27.4596	17.3599	13.8471
osa-MIR396i	TCCACAGGCTTTCTTGAAC	19	39	27	9	19.1236	7.94435	7.33083
osa-MIR3979	CTTCGGGGGAGGAGAGAAGC	20	87	5	8	42.6604	1.47118	6.5163
osa-MIR397a	TCATTGAGTGCAGCGTTGATG	21	60	44	5	29.421	12.9464	4.07269
osa-MIR397a	ATTGAGTGCAGCGTTGATGAA	21	22	33	1	10.7877	9.70976	0.814537
osa-MIR397a	TTGAGTGCAGCGTTGATGAAC	21	281	824	89	137.788	242.45	72.4938
osa-MIR397b	ATTGAGTGCAGCGTTGATGAA	21	22	33	1	10.7877	9.70976	0.814537
osa-MIR397b	TTGAGTGCAGCGTTGATGAACC	22	818	2160	472	401.106	635.548	384.462
osa-MIR397b	TTGAGTGCAGCGTTGATGAAC	21	281	824	89	137.788	242.45	72.4938
osa-MIR397b	TGAGTGCAGCGTTGATGAACC	21	6	115	20	2.9421	33.8371	16.2907
osa-MIR397b	TTCACCAGCACTGCACCCAATC	22	73	85	37	35.7955	25.01	30.1379
osa-MIR397b	TCACCAGCACTGCACCCAATC	21	108	147	75	52.9578	43.2526	61.0903
osa-MIR398b	GGGGCGAGCTGGGAACACACGGTG	24	19	63	16	9.31664	18.5368	13.0326
osa-MIR398b	GGGGCGAGCTGGGAACACACGGTGA	25	8	38	31	3.9228	11.1809	25.2507
osa-MIR398b	GGGGCGAGCTGGGAACACACGG	22	3	55	8	1.47105	16.1829	6.5163
osa-MIR398b	GGGGCGAGCTGGGAACACACGGT	23	3	48	17	1.47105	14.1233	13.8471
osa-MIR398b	GGGCGAGCTGGGAACACACGG	21	85	461	67	41.6797	135.642	54.574
osa-MIR398b	GGCGAGCTGGGAACACACGGT	21	14	136	20	6.8649	40.016	16.2907
osa-MIR399a	TGCCAAAGGAGAATTGCCCTG	21	11	21	13	5.39385	6.17894	10.589
osa-MIR399b	GTGCGATTCTCCTCTGGCATGGCA	24	4	40	58	1.9614	11.7694	47.2432
osa-MIR399b	TGCCAAAGGAGAATTGCCCTG	21	11	21	13	5.39385	6.17894	10.589
osa-MIR399c	TGCCAAAGGAGAATTGCCCTG	21	11	21	13	5.39385	6.17894	10.589
osa-MIR399d	GACAGTAGTAGGCAGCTCTCC	21	18	19	35	8.82629	5.59047	28.5088
osa-MIR399d	ACAGTAGTAGGCAGCTCTCC	20	1189	2629	1251	583.026	773.544	1018.99
osa-MIR399d	CAGTAGTAGGCAGCTCTCC	19	6	21	32	2.9421	6.17894	26.0652
osa-MIR399d	TGCCAAAGGAGAGTTGCCCTG	21	163	73	67	79.927	21.4792	54.574
osa-MIR399h	TGCCAAAGGAGACTTGCCCAG	21	37	78	98	18.1429	22.9503	79.8246
osa-MIR399i	GTGCAGTTCTCCTCTGGCATG	21	1	9	14	0.49035	2.64812	11.4035
osa-MIR399i	TGCCAAAGGAGAGCTGCCCTG	21	52	48	37	25.4982	14.1233	30.1379
osa-MIR399j	TGCCAAAGGAGAGTTGCCCTA	21	34	9	22	16.6719	2.64812	17.9198
osa-MIR408	AGACAGGGATGAGGCAGAGCA	21	61	77	11	29.9113	22.6561	8.95991
osa-MIR408	AGACAGGGATGAGGCAGAGCATGG	24	59	40	7	28.9306	11.7694	5.70176
osa-MIR408	GACAGGGATGAGGCAGAGCAT	21	15	41	4	7.35525	12.0636	3.25815
osa-MIR408	ACAGGGATGAGGCAGAGCATG	21	143	481	41	70.12	141.527	33.396
osa-MIR408	ACAGGGATGAGGCAGAGCATGG	22	35	47	5	17.1622	13.8291	4.07269
osa-MIR408	CAGGGATGAGGCAGAGCATGG	21	720	1248	169	353.052	367.206	137.657
osa-MIR408	CAGGGATGAGGCAGAGCATG	20	167	685	61	81.8884	201.551	49.6868
osa-MIR408	AGGGATGAGGCAGAGCATGGG	21	83	95	17	40.699	27.9523	13.8471
osa-MIR408	CTGCACTGCCTCTTCCCTGGC	21	79	50	28	38.7376	14.7118	22.807
osa-MIR435	CGGTATTGGAGTTGAGGGATG	21	52	57	11	25.4982	16.7714	8.95991
osa-MIR439a	GAACTGTGGTTGTTCGATAGGTAT	24	21	38	7	10.2973	11.1809	5.70176
osa-MIR439a	AACTGTGGTTGTTCGATAGGTATC	24	31	48	15	15.2008	14.1233	12.2181
osa-MIR439a	AACTGTGGTTGTTCGATAGGTA	22	28	30	2	13.7298	8.82706	1.62907
osa-MIR439a	ACTGTGGTTGTTCGATAGGTA	21	119	150	32	58.3516	44.1353	26.0652
osa-MIR439a	TAGGTATCCCTGTCGAACCGCGGT	24	13	27	22	6.37455	7.94435	17.9198
osa-MIR439a	AGGTATCCCTGTCGAACCGCGGTT	24	81	105	59	39.7183	30.8947	48.0577
osa-MIR439a	GGTATCCCTGTCGAACCGCGGTTG	24	30	15	18	14.7105	4.41353	14.6617
osa-MIR439a	GGTATCCCTGTCGAACCGCGGTT	23	9	31	16	4.41315	9.12129	13.0326
osa-MIR439a	GGTATCCCTGTCGAACCGCGGT	22	2	35	11	0.980699	10.2982	8.95991
osa-MIR439a	GTATCCCTGTCGAACCGCGGTT	22	26	57	15	12.7491	16.7714	12.2181
osa-MIR439a	TATCCCTGTCGAACCGCGGTTG	22	76	52	48	37.2666	15.3002	39.0978
osa-MIR439a	TCCCTGTCGAACCGCGGTTGTT	22	24	29	42	11.7684	8.53282	34.2106
osa-MIR439a	AACCGCGGTTGTTCGACAGGG	21	122	167	104	59.8227	49.1373	84.7119
osa-MIR439a	ACCGCGGTTGTTCGACAGGGT	21	22	41	7	10.7877	12.0636	5.70176
osa-MIR439a	CCGCGGTTGTTCGACAGGGTG	21	8	42	4	3.9228	12.3579	3.25815
osa-MIR439c	GAACTGTGGTTGTTCGATAGGTAT	24	21	38	7	10.2973	11.1809	5.70176
osa-MIR439c	AACTGTGGTTGTTCGATAGGTATC	24	31	48	15	15.2008	14.1233	12.2181
osa-MIR439c	AACTGTGGTTGTTCGATAGGTA	22	28	30	2	13.7298	8.82706	1.62907
osa-MIR439c	ACTGTGGTTGTTCGATAGGTA	21	119	150	32	58.3516	44.1353	26.0652
osa-MIR439c	TAGGTATCCCTGTCGAACCGCGGT	24	13	27	22	6.37455	7.94435	17.9198
osa-MIR439c	AGGTATCCCTGTCGAACCGCGGTT	24	81	105	59	39.7183	30.8947	48.0577
osa-MIR439c	GGTATCCCTGTCGAACCGCGGTTG	24	30	15	18	14.7105	4.41353	14.6617
osa-MIR439c	GGTATCCCTGTCGAACCGCGGTT	23	9	31	16	4.41315	9.12129	13.0326
osa-MIR439c	GGTATCCCTGTCGAACCGCGGT	22	2	35	11	0.980699	10.2982	8.95991
osa-MIR439c	GTATCCCTGTCGAACCGCGGTT	22	26	57	15	12.7491	16.7714	12.2181
osa-MIR439c	TATCCCTGTCGAACCGCGGTTG	22	76	52	48	37.2666	15.3002	39.0978
osa-MIR439c	TCCCTGTCGAACCGCGGTTGTT	22	24	29	42	11.7684	8.53282	34.2106
osa-MIR439c	AACCGCGGTTGTTCGACAGGG	21	122	167	104	59.8227	49.1373	84.7119
osa-MIR439c	ACCGCGGTTGTTCGACAGGGT	21	22	41	7	10.7877	12.0636	5.70176
osa-MIR439c	CCGCGGTTGTTCGACAGGGTG	21	8	42	4	3.9228	12.3579	3.25815
osa-MIR439d	GAACTGTGGTTGTTCGATAGGTAT	24	21	38	7	10.2973	11.1809	5.70176
osa-MIR439d	AACTGTGGTTGTTCGATAGGTATC	24	31	48	15	15.2008	14.1233	12.2181
osa-MIR439d	AACTGTGGTTGTTCGATAGGTA	22	28	30	2	13.7298	8.82706	1.62907
osa-MIR439d	ACTGTGGTTGTTCGATAGGTA	21	119	150	32	58.3516	44.1353	26.0652
osa-MIR439d	TAGGTATCCCTGTCGAACCGCGGT	24	13	27	22	6.37455	7.94435	17.9198
osa-MIR439d	AGGTATCCCTGTCGAACCGCGGTT	24	81	105	59	39.7183	30.8947	48.0577
osa-MIR439d	GGTATCCCTGTCGAACCGCGGTTG	24	30	15	18	14.7105	4.41353	14.6617
osa-MIR439d	GGTATCCCTGTCGAACCGCGGTT	23	9	31	16	4.41315	9.12129	13.0326
osa-MIR439d	GGTATCCCTGTCGAACCGCGGT	22	2	35	11	0.980699	10.2982	8.95991
osa-MIR439d	GTATCCCTGTCGAACCGCGGTT	22	26	57	15	12.7491	16.7714	12.2181
osa-MIR439d	TATCCCTGTCGAACCGCGGTTG	22	76	52	48	37.2666	15.3002	39.0978
osa-MIR439d	TCCCTGTCGAACCGCGGTTGTT	22	24	29	42	11.7684	8.53282	34.2106
osa-MIR439e	GAACTGTGGTTGTTCGATAGGTAT	24	21	38	7	10.2973	11.1809	5.70176
osa-MIR439e	AACTGTGGTTGTTCGATAGGTATC	24	31	48	15	15.2008	14.1233	12.2181
osa-MIR439e	AACTGTGGTTGTTCGATAGGTA	22	28	30	2	13.7298	8.82706	1.62907
osa-MIR439e	ACTGTGGTTGTTCGATAGGTA	21	119	150	32	58.3516	44.1353	26.0652
osa-MIR439e	TAGGTATCCCTGTCGAACCGCGGT	24	13	27	22	6.37455	7.94435	17.9198
osa-MIR439e	AGGTATCCCTGTCGAACCGCGGTT	24	81	105	59	39.7183	30.8947	48.0577
osa-MIR439e	GGTATCCCTGTCGAACCGCGGTTG	24	30	15	18	14.7105	4.41353	14.6617
osa-MIR439e	GGTATCCCTGTCGAACCGCGGTT	23	9	31	16	4.41315	9.12129	13.0326
osa-MIR439e	GGTATCCCTGTCGAACCGCGGT	22	2	35	11	0.980699	10.2982	8.95991
osa-MIR439e	GTATCCCTGTCGAACCGCGGTT	22	26	57	15	12.7491	16.7714	12.2181
osa-MIR439e	TATCCCTGTCGAACCGCGGTTG	22	76	52	48	37.2666	15.3002	39.0978
osa-MIR439e	TCCCTGTCGAACCGCGGTTGTT	22	24	29	42	11.7684	8.53282	34.2106
osa-MIR439e	AACCGCGGTTGTTCGACAGGG	21	122	167	104	59.8227	49.1373	84.7119
osa-MIR439e	ACCGCGGTTGTTCGACAGGGT	21	22	41	7	10.7877	12.0636	5.70176
osa-MIR439e	CCGCGGTTGTTCGACAGGGTG	21	8	42	4	3.9228	12.3579	3.25815
osa-MIR439f	GAACTGTGGTTGTTCGATAGGTAT	24	21	38	7	10.2973	11.1809	5.70176
osa-MIR439f	AACTGTGGTTGTTCGATAGGTATC	24	31	48	15	15.2008	14.1233	12.2181
osa-MIR439f	AACTGTGGTTGTTCGATAGGTA	22	28	30	2	13.7298	8.82706	1.62907
osa-MIR439f	ACTGTGGTTGTTCGATAGGTA	21	119	150	32	58.3516	44.1353	26.0652
osa-MIR439f	TAGGTATCCCTGTCGAACCGCGGT	24	13	27	22	6.37455	7.94435	17.9198
osa-MIR439f	AGGTATCCCTGTCGAACCGCGGTT	24	81	105	59	39.7183	30.8947	48.0577
osa-MIR439f	GGTATCCCTGTCGAACCGCGGTTG	24	30	15	18	14.7105	4.41353	14.6617
osa-MIR439f	GGTATCCCTGTCGAACCGCGGTT	23	9	31	16	4.41315	9.12129	13.0326
osa-MIR439f	GGTATCCCTGTCGAACCGCGGT	22	2	35	11	0.980699	10.2982	8.95991
osa-MIR439f	GTATCCCTGTCGAACCGCGGTT	22	26	57	15	12.7491	16.7714	12.2181
osa-MIR439f	TATCCCTGTCGAACCGCGGTTG	22	76	52	48	37.2666	15.3002	39.0978
osa-MIR439f	TCCCTGTCGAACCGCGGTTGTT	22	24	29	42	11.7684	8.53282	34.2106
osa-MIR439f	AACCGCGGTTGTTCGACAGGG	21	122	167	104	59.8227	49.1373	84.7119
osa-MIR439f	ACCGCGGTTGTTCGACAGGGT	21	22	41	7	10.7877	12.0636	5.70176
osa-MIR439f	CCGCGGTTGTTCGACAGGGTG	21	8	42	4	3.9228	12.3579	3.25815
osa-MIR439g	GAACTGTGGTTGTTCGATAGGTAT	24	21	38	7	10.2973	11.1809	5.70176
osa-MIR439g	AACTGTGGTTGTTCGATAGGTATC	24	31	48	15	15.2008	14.1233	12.2181
osa-MIR439g	AACTGTGGTTGTTCGATAGGTA	22	28	30	2	13.7298	8.82706	1.62907
osa-MIR439g	ACTGTGGTTGTTCGATAGGTA	21	119	150	32	58.3516	44.1353	26.0652
osa-MIR439g	TAGGTATCCCTGTCGAACCGCGGT	24	13	27	22	6.37455	7.94435	17.9198
osa-MIR439g	AGGTATCCCTGTCGAACCGCGGTT	24	81	105	59	39.7183	30.8947	48.0577
osa-MIR439g	GGTATCCCTGTCGAACCGCGGTTG	24	30	15	18	14.7105	4.41353	14.6617
osa-MIR439g	GGTATCCCTGTCGAACCGCGGTT	23	9	31	16	4.41315	9.12129	13.0326
osa-MIR439g	GGTATCCCTGTCGAACCGCGGT	22	2	35	11	0.980699	10.2982	8.95991
osa-MIR439g	GTATCCCTGTCGAACCGCGGTT	22	26	57	15	12.7491	16.7714	12.2181
osa-MIR439g	TATCCCTGTCGAACCGCGGTTG	22	76	52	48	37.2666	15.3002	39.0978
osa-MIR439g	TCCCTGTCGAACCGCGGTTGTT	22	24	29	42	11.7684	8.53282	34.2106
osa-MIR439h	GAACTGTGGTTGTTCGATAGGTAT	24	21	38	7	10.2973	11.1809	5.70176
osa-MIR439h	AACTGTGGTTGTTCGATAGGTATC	24	31	48	15	15.2008	14.1233	12.2181
osa-MIR439h	AACTGTGGTTGTTCGATAGGTA	22	28	30	2	13.7298	8.82706	1.62907
osa-MIR439h	ACTGTGGTTGTTCGATAGGTA	21	119	150	32	58.3516	44.1353	26.0652
osa-MIR439h	TAGGTATCCCTGTCGAACCGCGGT	24	13	27	22	6.37455	7.94435	17.9198
osa-MIR439h	AGGTATCCCTGTCGAACCGCGGTT	24	81	105	59	39.7183	30.8947	48.0577
osa-MIR439h	GGTATCCCTGTCGAACCGCGGTTG	24	30	15	18	14.7105	4.41353	14.6617
osa-MIR439h	GGTATCCCTGTCGAACCGCGGTT	23	9	31	16	4.41315	9.12129	13.0326
osa-MIR439h	GGTATCCCTGTCGAACCGCGGT	22	2	35	11	0.980699	10.2982	8.95991
osa-MIR439h	GTATCCCTGTCGAACCGCGGTT	22	26	57	15	12.7491	16.7714	12.2181
osa-MIR439h	TATCCCTGTCGAACCGCGGTTG	22	76	52	48	37.2666	15.3002	39.0978
osa-MIR439h	TCCCTGTCGAACCGCGGTTGTT	22	24	29	42	11.7684	8.53282	34.2106
osa-MIR439h	AACCGCGGTTGTTCGACAGGG	21	122	167	104	59.8227	49.1373	84.7119
osa-MIR439h	ACCGCGGTTGTTCGACAGGGT	21	22	41	7	10.7877	12.0636	5.70176
osa-MIR439h	CCGCGGTTGTTCGACAGGGTG	21	8	42	4	3.9228	12.3579	3.25815
osa-MIR439i	GAACTGTGGTTGTTCGATAGGTAT	24	21	38	7	10.2973	11.1809	5.70176
osa-MIR439i	AACTGTGGTTGTTCGATAGGTATC	24	31	48	15	15.2008	14.1233	12.2181
osa-MIR439i	AACTGTGGTTGTTCGATAGGTA	22	28	30	2	13.7298	8.82706	1.62907
osa-MIR439i	ACTGTGGTTGTTCGATAGGTA	21	119	150	32	58.3516	44.1353	26.0652
osa-MIR439i	TAGGTATCCCTGTCGAACCGCGGT	24	13	27	22	6.37455	7.94435	17.9198
osa-MIR439i	AGGTATCCCTGTCGAACCGCGGTT	24	81	105	59	39.7183	30.8947	48.0577
osa-MIR439i	GGTATCCCTGTCGAACCGCGGTTG	24	30	15	18	14.7105	4.41353	14.6617
osa-MIR439i	GGTATCCCTGTCGAACCGCGGTT	23	9	31	16	4.41315	9.12129	13.0326
osa-MIR439i	GGTATCCCTGTCGAACCGCGGT	22	2	35	11	0.980699	10.2982	8.95991
osa-MIR439i	GTATCCCTGTCGAACCGCGGTT	22	26	57	15	12.7491	16.7714	12.2181
osa-MIR439i	TATCCCTGTCGAACCGCGGTTG	22	76	52	48	37.2666	15.3002	39.0978
osa-MIR439i	TCCCTGTCGAACCGCGGTTGTT	22	24	29	42	11.7684	8.53282	34.2106
osa-MIR439i	AACCGCGGTTGTTCGACAGGG	21	122	167	104	59.8227	49.1373	84.7119
osa-MIR439i	AACCGCGGTTGTTCGACAGGGTGC	24	17	10	19	8.33594	2.94235	15.4762
osa-MIR439i	ACCGCGGTTGTTCGACAGGGT	21	22	41	7	10.7877	12.0636	5.70176
osa-MIR439i	CCGCGGTTGTTCGACAGGGTG	21	8	42	4	3.9228	12.3579	3.25815
osa-MIR439i	CGCGGTTGTTCGACAGGGTGC	21	19	53	9	9.31664	15.5945	7.33083
osa-MIR441a	AATGACTTACATTGTGAAACGGAG	24	32	17	11	15.6912	5.002	8.95991
osa-MIR441a	ATGACTTACATTGTGAAACGGAGG	24	21	16	10	10.2973	4.70776	8.14537
osa-MIR441a	TGACTTACATTGTGAAACGGAGGG	24	14	19	13	6.8649	5.59047	10.589
osa-MIR441a	GACTTACATTGTGAAACGGAGGGA	24	45	82	27	22.0657	24.1273	21.9925
osa-MIR441a	ACTTACATTGTGAAACGGAGGGAG	24	35	16	25	17.1622	4.70776	20.3634
osa-MIR444a	AGCTAGAGGTGGCAACTGCAT	21	91	142	35	44.6218	41.7814	28.5088
osa-MIR444a	GCTAGAGGTGGCAACTGCATA	21	557	523	230	273.125	153.885	187.344
osa-MIR444a	TAGAGGTGGCAACTGCATAATT	22	49	41	13	24.0271	12.0636	10.589
osa-MIR444a	TAGAGGTGGCAACTGCATAAT	21	25	25	5	12.2587	7.35588	4.07269
osa-MIR444a	TGCAGTTGCTGCCTCAAGCTT	21	988	420	308	484.465	123.579	250.877
osa-MIR444a	GCAGTTGCTGCCTCAAGCTTG	21	26	15	7	12.7491	4.41353	5.70176
osa-MIR444b	TGCAGTTGTTGTCTCAAGCTT	21	5781	3335	1640	2834.71	981.275	1335.84
osa-MIR444b	TGCAGTTGTTGTCTCAAGCT	20	57	48	9	27.9499	14.1233	7.33083
osa-MIR444b	TGCAGTTGTTGTCTCAAGC	19	28	22	9	13.7298	6.47318	7.33083
osa-MIR444b	TGTTGTCTCAAGCTTGCTGCC	21	484	245	91	237.329	72.0876	74.1229
osa-MIR444c	GCGGCAAGCTAGAGACAGCAA	21	247	433	142	121.116	127.404	115.664
osa-MIR444c	CGGCAAGCTAGAGACAGCAAC	21	8723	13530	4877	4277.32	3981	3972.5
osa-MIR444c	CGGCAAGCTAGAGACAGCAACT	22	51	95	25	25.0078	27.9523	20.3634
osa-MIR444c	CGGCAAGCTAGAGACAGCAA	20	28	63	26	13.7298	18.5368	21.178
osa-MIR444c	CGGCAAGCTAGAGACAGCAACTGC	24	15	22	13	7.35525	6.47318	10.589
osa-MIR444c	GGCAAGCTAGAGACAGCAAC	20	28	42	14	13.7298	12.3579	11.4035
osa-MIR444c	AGCTAGAGACAGCAACTGCAT	21	33	46	23	16.1815	13.5348	18.7344
osa-MIR444c	GCTAGAGACAGCAACTGCATA	21	19	23	13	9.31664	6.76741	10.589
osa-MIR444c	TAGAGACAGCAACTGCATATC	21	30	47	9	14.7105	13.8291	7.33083
osa-MIR444c	AGAGACAGCAACTGCATATCT	21	117	146	30	57.3709	42.9583	24.4361
osa-MIR444c	AGAGACAGCAACTGCATATC	20	22	27	14	10.7877	7.94435	11.4035
osa-MIR444c	TGCATATCTTGCAAGAAAATCGGTT	25	6	15	17	2.9421	4.41353	13.8471
osa-MIR444c	TGCATATCTTGCAAGAAAATCGGTTTTA	28	3	25	13	1.47105	7.35588	10.589
osa-MIR444c	AGCTGTGCAGTTGTTGTCTCA	21	24	11	3	11.7684	3.23659	2.44361
osa-MIR444c	TGCAGTTGTTGTCTCAAGCTT	21	5781	3335	1640	2834.71	981.275	1335.84
osa-MIR444c	TGCAGTTGTTGTCTCAAGCT	20	57	48	9	27.9499	14.1233	7.33083
osa-MIR444c	TGCAGTTGTTGTCTCAAGC	19	28	22	9	13.7298	6.47318	7.33083
osa-MIR444c	TGTTGTCTCAAGCTTGCTGCC	21	484	245	91	237.329	72.0876	74.1229
osa-MIR444d	TGCAGTTGCTGCCTCAAGCTT	21	988	420	308	484.465	123.579	250.877
osa-MIR444d	GCAGTTGCTGCCTCAAGCTTG	21	26	15	7	12.7491	4.41353	5.70176
osa-MIR444e	TGCAGTTGCTGCCTCAAGCTT	21	988	420	308	484.465	123.579	250.877
osa-MIR444f	TGCAGTTGTTGCCTCAAGCTT	21	50	21	22	24.5175	6.17894	17.9198
osa-MIR445a	TCTGCGAGACGAATTTTTTAA	21	23	6	3	11.278	1.76541	2.44361
osa-MIR445c	TCTGCGAGACGAATTTTTTAA	21	23	6	3	11.278	1.76541	2.44361
osa-MIR445d	AACATCCGATGTGATAGGGACTAA	24	30	19	18	14.7105	5.59047	14.6617
osa-MIR445e	TCTGCGAGACGAATTTTTTAA	21	23	6	3	11.278	1.76541	2.44361
osa-MIR445f	TCTGCGGGACGAATTTTTTAA	21	79	28	1	38.7376	8.23859	0.814537
osa-MIR445g	TCTGCGAGACGAATTTTTTAA	21	23	6	3	11.278	1.76541	2.44361
osa-MIR445h	TCTGCGAGACGAATTTTTTAA	21	23	6	3	11.278	1.76541	2.44361
osa-MIR446	ACTTACATTGTGAAACGGAGGGAG	24	35	16	25	17.1622	4.70776	20.3634
osa-MIR5076	CTCGAAATGGGAGCAGAGCAGGTTTGA	27	16	1	13	7.84559	0.294235	10.589
osa-MIR5076	AATGGGAGCAGAGCAGGTTTGAA	23	12	3	17	5.8842	0.882706	13.8471
osa-MIR5076	ATGGGAGCAGAGCAGGTTTGAA	22	31	2	13	15.2008	0.588471	10.589
osa-MIR5076	ATGGGAGCAGAGCAGGTTTGA	21	17	4	15	8.33594	1.17694	12.2181
osa-MIR5076	TGGGAGCAGAGCAGGTTTGAA	21	38	4	17	18.6333	1.17694	13.8471
osa-MIR5076	TGGGAGCAGAGCAGGTTTGA	20	18	5	14	8.82629	1.47118	11.4035
osa-MIR5078	TCGCTAGAATGTCATCGTGGACGG	24	17	163	10	8.33594	47.9603	8.14537
osa-MIR5078	GGAAGAGAAGATCCAAGGGCA	21	17	43	8	8.33594	12.6521	6.5163
osa-MIR5078	GGAAGAGAAGATCCAAGGGC	20	14	41	9	6.8649	12.0636	7.33083
osa-MIR5082	GCGATGATGGCCGCGCGGGTTCA	23	33	99	121	16.1815	29.1293	98.559
osa-MIR5082	GCGATGATGGCCGCGCGGGTTC	22	15	49	60	7.35525	14.4175	48.8722
osa-MIR5082	GCGATGATGGCCGCGCGGGTT	21	10	27	39	4.9035	7.94435	31.767
osa-MIR5083	GAGGCTGTGATGACCAAAA	19	12	1	19	5.8842	0.294235	15.4762
osa-MIR5083	AGGCTGTGATGACCAAAAAATACCTA	26	92	105	538	45.1122	30.8947	438.221
osa-MIR5083	AGGCTGTGATGACCAAAAA	19	59	49	153	28.9306	14.4175	124.624
osa-MIR5083	AGGCTGTGATGACCAAAAAATACCTACC	28	34	75	505	16.6719	22.0676	411.341
osa-MIR5083	AGGCTGTGATGACCAAAAAATACCTACCT	29	25	358	363	12.2587	105.336	295.677
osa-MIR5083	AGGCTGTGATGACCAAAAAATACCTAC	27	24	35	274	11.7684	10.2982	223.183
osa-MIR5083	AGGCTGTGATGACCAAAAAA	20	19	20	30	9.31664	5.88471	24.4361
osa-MIR5083	AGGCTGTGATGACCAAAAAATACCT	25	15	37	39	7.35525	10.8867	31.767
osa-MIR5083	AGGCTGTGATGACCAAAAAATA	22	9	20	63	4.41315	5.88471	51.3158
osa-MIR5083	AGGCTGTGATGACCAAAA	18	8	2	36	3.9228	0.588471	29.3233
osa-MIR5083	AGGCTGTGATGACCAAAAAATACCTACCTA	30	8	21	31	3.9228	6.17894	25.2507
osa-MIR5083	AGGCTGTGATGACCAAAAAATACC	24	8	6	30	3.9228	1.76541	24.4361
osa-MIR5083	AGGCTGTGATGACCAAAAAATAC	23	4	2	16	1.9614	0.588471	13.0326
osa-MIR5083	GGCTGTGATGACCAAAAAATACCTACC	27	2	0	13	0.980699	0	10.589
osa-MIR5083	TAGAAACCAATGGATCCTTCTGAGCCTG	28	2	9	51	0.980699	2.64812	41.5414
osa-MIR5083	TAGAAACCAATGGATCCTTCTGA	23	2	2	13	0.980699	0.588471	10.589
osa-MIR5083	AGAAACCAATGGATCCTTCTGA	22	6	19	80	2.9421	5.59047	65.163
osa-MIR5083	GAAACCAATGGATCCTTCTGAGCCTG	26	2	0	17	0.980699	0	13.8471
osa-MIR5083	AAACCAATGGATCCTTCTGAGCCTG	25	6	5	14	2.9421	1.47118	11.4035
osa-MIR5083	AACCAATGGATCCTTCTGAGCCTG	24	3	3	42	1.47105	0.882706	34.2106
osa-MIR5083	CCAATGGATCCTTCTGAGCCTG	22	4	0	63	1.9614	0	51.3158
osa-MIR5083	CAATGGATCCTTCTGAGCCTG	21	10	8	157	4.9035	2.35388	127.882
osa-MIR5083	AATGGATCCTTCTGAGCCTG	20	2	2	45	0.980699	0.588471	36.6542
osa-MIR5083	ATGGATCCTTCTGAGCCTG	19	2	3	43	0.980699	0.882706	35.0251
osa-MIR5083	ACAGAAACTGTATGTGTTGA	20	3	0	31	1.47105	0	25.2507
osa-MIR5083	ACAGAAACTGTATGTGTTGACCCA	24	3	6	28	1.47105	1.76541	22.807
osa-MIR5083	AAATTCAGACTACAATTATCTGATCA	26	5	3	19	2.45175	0.882706	15.4762
osa-MIR5083	AGACTACAATTATCTGATCA	20	24	19	82	11.7684	5.59047	66.7921
osa-MIR5083	AGACTACAATTATCTGATCAA	21	9	2	16	4.41315	0.588471	13.0326
osa-MIR5083	ACCAATGGATCCTTCTGAGCCTG	23	0	1	16	0	0.294235	13.0326
osa-MIR5083	TGGATCCTTCTGAGCCTG	18	0	0	32	0	0	26.0652
osa-MIR528	TGGAAGGGGCATGCAGAGGAG	21	35936	39582	11054	17621.2	11646.4	9003.89
osa-MIR528	TGGAAGGGGCATGCAGAGGA	20	314	703	197	153.97	206.847	160.464
osa-MIR528	TGGAAGGGGCATGCAGAGGAGC	22	144	151	40	70.6104	44.4295	32.5815
osa-MIR528	TGGAAGGGGCATGCAGAGG	19	53	99	20	25.9885	29.1293	16.2907
osa-MIR528	TGGAAGGGGCATGCAGAG	18	42	54	30	20.5947	15.8887	24.4361
osa-MIR528	GGAAGGGGCATGCAGAGGAG	20	62	160	48	30.4017	47.0776	39.0978
osa-MIR528	GAAGGGGCATGCAGAGGAG	19	25	99	14	12.2587	29.1293	11.4035
osa-MIR528	AAGGGGCATGCAGAGGAG	18	32	133	26	15.6912	39.1333	21.178
osa-MIR529a	AGAAGAGAGAGAGTACAGCCT	21	248	66	89	121.607	19.4195	72.4938
osa-MIR529b	AGAAGAGAGAGAGTACAGCTT	21	85	134	77	41.6797	39.4275	62.7194
osa-MIR530	TGCATTTGCACCTGCACCTAC	21	296	306	108	145.144	90.036	87.97
osa-MIR530	AGGTGCAGAGGCAGATGCAAC	21	879	534	243	431.017	157.122	197.933
osa-MIR531	CTCGCCGGGGCTGCGTGCCGCCA	23	19	1071	58	9.31664	315.126	47.2432
osa-MIR531	CTCGCCGGGGCTGCGTGCCGCCAT	24	12	726	51	5.8842	213.615	41.5414
osa-MIR531	CTCGCCGGGGCTGCGTGCCGCCATA	25	4	206	27	1.9614	60.6125	21.9925
osa-MIR531b	CTCGCCGGGGCTGCGTGCCGCCA	23	19	1071	58	9.31664	315.126	47.2432
osa-MIR531b	CTCGCCGGGGCTGCGTGCCGCCAT	24	12	726	51	5.8842	213.615	41.5414
osa-MIR531b	CTCGCCGGGGCTGCGTGCCGCCATA	25	4	206	27	1.9614	60.6125	21.9925
osa-MIR531b	TAGCTGGTGCGCATCCCCGTCGAGCG	26	6	127	17	2.9421	37.3679	13.8471
osa-MIR531b	AGCTGGTGCGCATCCCCGTCGAGC	24	2	41	5	0.980699	12.0636	4.07269
osa-MIR535	CGGTGACAACGAGAGAGAGCACGC	24	9	78	8	4.41315	22.9503	6.5163
osa-MIR535	TGACAACGAGAGAGAGCACGC	21	5596	26136	3648	2744	7690.13	2971.43
osa-MIR535	TGACAACGAGAGAGAGCACG	20	15	145	11	7.35525	42.6641	8.95991
osa-MIR535	GACAACGAGAGAGAGCACGC	20	11	49	6	5.39385	14.4175	4.88722
osa-MIR535	GTGCTTTCTCCCGTTGTCACT	21	13	70	38	6.37455	20.5965	30.9524
osa-MIR806a	AAAATGTTTGACACCGTTGACTTT	24	23	13	5	11.278	3.82506	4.07269
osa-MIR806a	TTTGACACCGTTGACTTTTT	20	22	20	0	10.7877	5.88471	0
osa-MIR806a	TTTGACACCGTTGACTTTTTA	21	22	17	6	10.7877	5.002	4.88722
osa-MIR806a	AAGACGAACGGTTAAACATGTGCT	24	57	22	17	27.9499	6.47318	13.8471
osa-MIR806a	AGACGAACGGTTAAACATGTGCTA	24	163	64	28	79.927	18.8311	22.807
osa-MIR806a	ACATGTGCTAAAAAGTCAACGGTG	24	26	14	4	12.7491	4.11929	3.25815
osa-MIR806a	AAAAAGTCAACGGTGTCAAACATT	24	238	197	68	116.703	57.9643	55.3885
osa-MIR806a	AAAAGTCAACGGTGTCAAACATTT	24	42	39	10	20.5947	11.4752	8.14537
osa-MIR806a	AAAGTCAACGGTGTCAAACATTTT	24	25	19	9	12.2587	5.59047	7.33083
osa-MIR806b	AAAATGTTTGACACCGTTGACTTT	24	23	13	5	11.278	3.82506	4.07269
osa-MIR806b	TTTGACACCGTTGACTTTTT	20	22	20	0	10.7877	5.88471	0
osa-MIR806b	TTTGACACCGTTGACTTTTTA	21	22	17	6	10.7877	5.002	4.88722
osa-MIR806c	AAAATGTTTGACACCGTTGACTTT	24	23	13	5	11.278	3.82506	4.07269
osa-MIR806c	TTTGACACCGTTGACTTTTT	20	22	20	0	10.7877	5.88471	0
osa-MIR806c	TTTGACACCGTTGACTTTTTA	21	22	17	6	10.7877	5.002	4.88722
osa-MIR806c	TGAATAAGACGAATGGTCAAACAT	24	16	28	17	7.84559	8.23859	13.8471
osa-MIR806c	ACATGTGCTAAAAAGTCAACGGTG	24	26	14	4	12.7491	4.11929	3.25815
osa-MIR806c	AAAAAGTCAACGGTGTCAAACATT	24	238	197	68	116.703	57.9643	55.3885
osa-MIR806c	AAAAGTCAACGGTGTCAAACATTT	24	42	39	10	20.5947	11.4752	8.14537
osa-MIR806c	AAAGTCAACGGTGTCAAACATTTC	24	22	17	10	10.7877	5.002	8.14537
osa-MIR806c	ACGGTGTCAAACATTTCGAAACGG	24	18	16	16	8.82629	4.70776	13.0326
osa-MIR806d	ACATGTGCTAAAAAGTCAACGGTG	24	26	14	4	12.7491	4.11929	3.25815
osa-MIR806d	AAAAAGTCAACGGTGTCAAACATT	24	238	197	68	116.703	57.9643	55.3885
osa-MIR806d	AAAAGTCAACGGTGTCAAACATTT	24	42	39	10	20.5947	11.4752	8.14537
osa-MIR806d	AAAGTCAACGGTGTCAAACATTTT	24	25	19	9	12.2587	5.59047	7.33083
osa-MIR806e	AAAATGTTTGACGCCGTTGACTTT	24	58	43	5	28.4403	12.6521	4.07269
osa-MIR806e	TTTGACGCCGTTGACTTTTTA	21	84	50	10	41.1894	14.7118	8.14537
osa-MIR806e	TTTGACGCCGTTGACTTTTT	20	73	84	15	35.7955	24.7158	12.2181
osa-MIR806e	TTTGACGCCGTTGACTTTTTAGCA	24	41	65	10	20.1043	19.1253	8.14537
osa-MIR806e	TTTGACGCCGTTGACTTTTTAGC	23	29	12	2	14.2201	3.53082	1.62907
osa-MIR806e	TTGACGCCGTTGACTTTTTAGCAT	24	48	57	17	23.5368	16.7714	13.8471
osa-MIR806e	AAATAAGACGAACGGTCAAACATG	24	52	29	12	25.4982	8.53282	9.77445
osa-MIR806e	AATAAGACGAACGGTCAAACATGT	24	38	29	15	18.6333	8.53282	12.2181
osa-MIR806e	ATAAGACGAACGGTCAAACATGTG	24	81	45	25	39.7183	13.2406	20.3634
osa-MIR806e	TAAGACGAACGGTCAAACATGTGC	24	11	54	13	5.39385	15.8887	10.589
osa-MIR806e	AAGACGAACGGTCAAACATGTGCT	24	71	32	18	34.8148	9.41553	14.6617
osa-MIR806e	AGACGAACGGTCAAACATGTGCTA	24	124	54	34	60.8034	15.8887	27.6943
osa-MIR806e	ACATGTGCTAAAAAGTCAACGGTG	24	26	14	4	12.7491	4.11929	3.25815
osa-MIR806e	AAAAAGTCAACGGTGTCAAATATT	24	64	35	17	31.3824	10.2982	13.8471
osa-MIR806e	AAAAGTCAACGGTGTCAAATATTT	24	32	15	6	15.6912	4.41353	4.88722
osa-MIR806f	ACATGTGCTAAAAAGTCAACGGTG	24	26	14	4	12.7491	4.11929	3.25815
osa-MIR806f	AAAAAGTCAACGGTGTCAAATATT	24	64	35	17	31.3824	10.2982	13.8471
osa-MIR806f	AAAAGTCAACGGTGTCAAATATTT	24	32	15	6	15.6912	4.41353	4.88722
osa-MIR806f	TTTGACGCCGTTGACTTTTTA	21	84	50	10	41.1894	14.7118	8.14537
osa-MIR806f	TTTGACGCCGTTGACTTTTT	20	73	84	15	35.7955	24.7158	12.2181
osa-MIR806g	TGAATAAGACGAACGGTCAAACAT	24	208	265	125	101.993	77.9723	101.817
osa-MIR806g	TGAATAAGACGAACGGTCAAACA	23	32	28	14	15.6912	8.23859	11.4035
osa-MIR806g	GAATAAGACGAACGGTCAAACATG	24	193	181	56	94.6375	53.2566	45.6141
osa-MIR806g	AATAAGACGAACGGTCAAACATGT	24	38	29	15	18.6333	8.53282	12.2181
osa-MIR806g	ATAAGACGAACGGTCAAACATGTG	24	81	45	25	39.7183	13.2406	20.3634
osa-MIR806g	TAAGACGAACGGTCAAACATGTGC	24	11	54	13	5.39385	15.8887	10.589
osa-MIR806g	AAGACGAACGGTCAAACATGTGCT	24	71	32	18	34.8148	9.41553	14.6617
osa-MIR806g	AGACGAACGGTCAAACATGTGCTA	24	124	54	34	60.8034	15.8887	27.6943
osa-MIR806g	ACATGTGCTAAAAAGTCAACGGTG	24	26	14	4	12.7491	4.11929	3.25815
osa-MIR806g	AAAAAGTCAACGGTGTCAAACATT	24	238	197	68	116.703	57.9643	55.3885
osa-MIR806g	AAAAGTCAACGGTGTCAAACATTT	24	42	39	10	20.5947	11.4752	8.14537
osa-MIR806g	AAAGTCAACGGTGTCAAACATTTT	24	25	19	9	12.2587	5.59047	7.33083
osa-MIR806h	TGAATAAGACGAATGGTCAAACAT	24	16	28	17	7.84559	8.23859	13.8471
osa-MIR806h	ACATGTGCTAAAAAGTCAACGGTG	24	26	14	4	12.7491	4.11929	3.25815
osa-MIR806h	AAAAAGTCAACGGTGTCAAACATT	24	238	197	68	116.703	57.9643	55.3885
osa-MIR806h	AAAAGTCAACGGTGTCAAACATTT	24	42	39	10	20.5947	11.4752	8.14537
osa-MIR806h	ACGGTGTCAAACATTTAGAAACGG	24	27	10	10	13.2394	2.94235	8.14537
osa-MIR809b	AGAATGACTTACATTGTGAAACGG	24	124	51	88	60.8034	15.006	71.6793
osa-MIR809b	GAATGACTTACATTGTGAAACGGA	24	66	50	36	32.3631	14.7118	29.3233
osa-MIR809b	AATGACTTACATTGTGAAACGGAG	24	32	17	11	15.6912	5.002	8.95991
osa-MIR809b	ATGACTTACATTGTGAAACGGAGG	24	21	16	10	10.2973	4.70776	8.14537
osa-MIR809b	TGACTTACATTGTGAAACGGAGGG	24	14	19	13	6.8649	5.59047	10.589
osa-MIR809b	GACTTACATTGTGAAACGGAGGGA	24	45	82	27	22.0657	24.1273	21.9925
osa-MIR809b	ACTTACATTGTGAAACGGAGGGAG	24	35	16	25	17.1622	4.70776	20.3634
osa-MIR809d	AGAATGACTTACATTGTGAAACGG	24	124	51	88	60.8034	15.006	71.6793
osa-MIR809d	GAATGACTTACATTGTGAAACGGA	24	66	50	36	32.3631	14.7118	29.3233
osa-MIR809d	AATGACTTACATTGTGAAACGGAG	24	32	17	11	15.6912	5.002	8.95991
osa-MIR809d	ATGACTTACATTGTGAAACGGAGG	24	21	16	10	10.2973	4.70776	8.14537
osa-MIR809d	TGACTTACATTGTGAAACGGAGGA	24	33	29	19	16.1815	8.53282	15.4762
osa-MIR809d	GACTTACATTGTGAAACGGAGGAA	24	63	151	49	30.892	44.4295	39.9123
osa-MIR809d	GACTTACATTGTGAAACGGAGGA	23	15	36	13	7.35525	10.5925	10.589
osa-MIR809g	AGAATGACTTACATTGTGAAACGG	24	124	51	88	60.8034	15.006	71.6793
osa-MIR809g	GAATGACTTACATTGTGAAACGGA	24	66	50	36	32.3631	14.7118	29.3233
osa-MIR809g	AATGACTTACATTGTGAAACGGAG	24	32	17	11	15.6912	5.002	8.95991
osa-MIR809g	ATGACTTACATTGTGAAACGGAGG	24	21	16	10	10.2973	4.70776	8.14537
osa-MIR809g	TGACTTACATTGTGAAACGGAGGG	24	14	19	13	6.8649	5.59047	10.589
osa-MIR809g	GACTTACATTGTGAAACGGAGGGA	24	45	82	27	22.0657	24.1273	21.9925
osa-MIR809g	ACTTACATTGTGAAACGGAGGGAG	24	35	16	25	17.1622	4.70776	20.3634
osa-MIR810a	CTAACGGCATAATTAGATCAC	21	89	221	56	43.6411	65.026	45.6141
osa-MIR810a	CTAACGGCATAATTAGATCACT	22	25	47	15	12.2587	13.8291	12.2181
osa-MIR810a	AACGGCATAATTAGATCACTT	21	45	63	12	22.0657	18.5368	9.77445
osa-MIR810a	AACGGCATAATTAGATCACTTG	22	44	81	4	21.5754	23.8331	3.25815
osa-MIR810a	ACGGCATAATTAGATCACTTGATG	24	42	109	10	20.5947	32.0716	8.14537
osa-MIR810a	ACGGCATAATTAGATCACTTG	21	30	63	17	14.7105	18.5368	13.8471
osa-MIR810a	ACGGCATAATTAGATCACTTGA	22	23	39	8	11.278	11.4752	6.5163
osa-MIR810a	CGGCATAATTAGATCACTTGAT	22	79	192	44	38.7376	56.4932	35.8396
osa-MIR810a	CGGCATAATTAGATCACTTGA	21	21	41	14	10.2973	12.0636	11.4035
osa-MIR810a	CGGCATAATTAGATCACTTGATG	23	15	65	10	7.35525	19.1253	8.14537
osa-MIR810a	TAGATCACTTGATGACGACGT	21	22	20	9	10.7877	5.88471	7.33083
osa-MIR810a	TTGATGACGACGTATATCGGTG	22	26	26	4	12.7491	7.65012	3.25815
osa-MIR810a	ACGACGTATATCGGTGTTCGC	21	68	136	34	33.3438	40.016	27.6943
osa-MIR810a	CGACGTATATCGGTGTTCGCT	21	24	21	6	11.7684	6.17894	4.88722
osa-MIR810b	CTAACGGCATAATTAGATCAC	21	89	221	56	43.6411	65.026	45.6141
osa-MIR810b	CTAACGGCATAATTAGATCACT	22	25	47	15	12.2587	13.8291	12.2181
osa-MIR810b	AACGGCATAATTAGATCACTT	21	45	63	12	22.0657	18.5368	9.77445
osa-MIR810b	AACGGCATAATTAGATCACTTG	22	44	81	4	21.5754	23.8331	3.25815
osa-MIR810b	ACGGCATAATTAGATCACTTGATG	24	42	109	10	20.5947	32.0716	8.14537
osa-MIR810b	ACGGCATAATTAGATCACTTG	21	30	63	17	14.7105	18.5368	13.8471
osa-MIR810b	ACGGCATAATTAGATCACTTGA	22	23	39	8	11.278	11.4752	6.5163
osa-MIR810b	CGGCATAATTAGATCACTTGAT	22	79	192	44	38.7376	56.4932	35.8396
osa-MIR810b	CGGCATAATTAGATCACTTGA	21	21	41	14	10.2973	12.0636	11.4035
osa-MIR810b	CGGCATAATTAGATCACTTGATG	23	15	65	10	7.35525	19.1253	8.14537
osa-MIR810b	TAGATCACTTGATGACGACGT	21	22	20	9	10.7877	5.88471	7.33083
osa-MIR810b	TTGATGACGACGTATATCGGTG	22	26	26	4	12.7491	7.65012	3.25815
osa-MIR810b	ACGACGTATATCGGTGTTCGC	21	68	136	34	33.3438	40.016	27.6943
osa-MIR810b	CGACGTATATCGGTGTTCGCT	21	24	21	6	11.7684	6.17894	4.88722
osa-MIR810b	CCAGTAGATAGTATATATAGTG	22	52	59	22	25.4982	17.3599	17.9198
osa-MIR810b	CAGTAGATAGTATATATAGTG	21	34	47	17	16.6719	13.8291	13.8471
osa-MIR810b	TGAACACCGATATGCGTCATC	21	32	52	15	15.6912	15.3002	12.2181
osa-MIR811a	GTGACGTGGACGAATCTCGGA	21	34	53	14	16.6719	15.5945	11.4035
osa-MIR811a	TGACGTGGACGAATCTCGGAC	21	21	35	9	10.2973	10.2982	7.33083
osa-MIR811c	ACTCAGGGTGACGTGGACGAA	21	22	52	19	10.7877	15.3002	15.4762
osa-MIR811c	TCAGGGTGACGTGGACGAATC	21	32	50	9	15.6912	14.7118	7.33083
osa-MIR811c	GGTGACGTGGACGAATCTCGGACG	24	42	69	17	20.5947	20.3022	13.8471
osa-MIR811c	GTGACGTGGACGAATCTCGGA	21	34	53	14	16.6719	15.5945	11.4035
osa-MIR811c	TGACGTGGACGAATCTCGGAC	21	21	35	9	10.2973	10.2982	7.33083
osa-MIR812a	AAATTTTTCAAATAAGACGGACGG	24	189	148	39	92.6761	43.5468	31.767
osa-MIR812a	AATTTTTCAAATAAGACGGACGGT	24	51	18	7	25.0078	5.29623	5.70176
osa-MIR812a	ATTTTTCAAATAAGACGGACGGTT	24	24	6	1	11.7684	1.76541	0.814537
osa-MIR812a	GACGGTTAAACGTTGGACACGGAT	24	62	67	34	30.4017	19.7138	27.6943
osa-MIR812b	AAAAATTTTCAAATAAGACGGACG	24	76	52	5	37.2666	15.3002	4.07269
osa-MIR812b	AAAATTTTCAAATAAGACGGACGG	24	116	51	9	56.8806	15.006	7.33083
osa-MIR812b	AAATTTTCAAATAAGACGGACGGT	24	89	47	12	43.6411	13.8291	9.77445
osa-MIR812b	ATTTTCAAATAAGACGGACGGTTA	24	34	10	6	16.6719	2.94235	4.88722
osa-MIR812c	GACGGTTAAACGTTGGACACGGAA	24	67	93	27	32.8534	27.3639	21.9925
osa-MIR812c	ACGGTTAAACGTTGGACACGGAAA	24	51	67	34	25.0078	19.7138	27.6943
osa-MIR812e	GACGGTTAAACGTTGGACACGGAA	24	67	93	27	32.8534	27.3639	21.9925
osa-MIR812e	ACGGTTAAACGTTGGACACGGAAA	24	51	67	34	25.0078	19.7138	27.6943
osa-MIR812f	ACGGATGATTAAAGTTGGACACGG	24	488	558	65	239.291	164.183	52.9449
osa-MIR812f	ACGGATGATTAAAGTTGGACACGGA	25	33	32	7	16.1815	9.41553	5.70176
osa-MIR812f	GATGATTAAAGTTGGACACGGAAA	24	169	187	17	82.8691	55.022	13.8471
osa-MIR812g	AATAAGACGGATGATTAAAGTTGG	24	19	34	10	9.31664	10.004	8.14537
osa-MIR812g	ATAAGACGGATGATTAAAGTTGGA	24	133	158	32	65.2165	46.4892	26.0652
osa-MIR812g	TAAGACGGATGATTAAAGTTGGAC	24	98	175	52	48.0543	51.4912	42.3559
osa-MIR812g	AAGACGGATGATTAAAGTTGGACA	24	3594	5859	1026	1762.32	1723.92	835.715
osa-MIR812g	AAGACGGATGATTAAAGTTGGAC	23	43	184	29	21.085	54.1393	23.6216
osa-MIR812g	AGACGGATGATTAAAGTTGGACA	23	32	81	14	15.6912	23.8331	11.4035
osa-MIR812g	AGACGGATGATTAAAGTTGGAC	22	9	42	8	4.41315	12.3579	6.5163
osa-MIR812g	GACGGATGATTAAAGTTGGACA	22	10	49	14	4.9035	14.4175	11.4035
osa-MIR812h	AATAAGACGGATGATTAAAGTTGG	24	19	34	10	9.31664	10.004	8.14537
osa-MIR812h	ATAAGACGGATGATTAAAGTTGGA	24	133	158	32	65.2165	46.4892	26.0652
osa-MIR812h	TAAGACGGATGATTAAAGTTGGAC	24	98	175	52	48.0543	51.4912	42.3559
osa-MIR812h	AAGACGGATGATTAAAGTTGGACA	24	3594	5859	1026	1762.32	1723.92	835.715
osa-MIR812h	AAGACGGATGATTAAAGTTGGAC	23	43	184	29	21.085	54.1393	23.6216
osa-MIR812h	AGACGGATGATTAAAGTTGGACAC	24	73	107	16	35.7955	31.4832	13.0326
osa-MIR812h	AGACGGATGATTAAAGTTGGACA	23	32	81	14	15.6912	23.8331	11.4035
osa-MIR812h	AGACGGATGATTAAAGTTGGAC	22	9	42	8	4.41315	12.3579	6.5163
osa-MIR812h	GACGGATGATTAAAGTTGGACACG	24	345	414	45	169.171	121.813	36.6542
osa-MIR812h	GACGGATGATTAAAGTTGGACA	22	10	49	14	4.9035	14.4175	11.4035
osa-MIR812i	AATAAGACGGATGATTAAAGTTGG	24	19	34	10	9.31664	10.004	8.14537
osa-MIR812i	ATAAGACGGATGATTAAAGTTGGA	24	133	158	32	65.2165	46.4892	26.0652
osa-MIR812i	TAAGACGGATGATTAAAGTTGGAC	24	98	175	52	48.0543	51.4912	42.3559
osa-MIR812i	AAGACGGATGATTAAAGTTGGACA	24	3594	5859	1026	1762.32	1723.92	835.715
osa-MIR812i	AAGACGGATGATTAAAGTTGGAC	23	43	184	29	21.085	54.1393	23.6216
osa-MIR812i	AGACGGATGATTAAAGTTGGACAC	24	73	107	16	35.7955	31.4832	13.0326
osa-MIR812i	AGACGGATGATTAAAGTTGGACA	23	32	81	14	15.6912	23.8331	11.4035
osa-MIR812i	AGACGGATGATTAAAGTTGGAC	22	9	42	8	4.41315	12.3579	6.5163
osa-MIR812i	GACGGATGATTAAAGTTGGACACG	24	345	414	45	169.171	121.813	36.6542
osa-MIR812i	GACGGATGATTAAAGTTGGACA	22	10	49	14	4.9035	14.4175	11.4035
osa-MIR812j	AATAAGACGGATGATTAAAGTTGG	24	19	34	10	9.31664	10.004	8.14537
osa-MIR812j	ATAAGACGGATGATTAAAGTTGGA	24	133	158	32	65.2165	46.4892	26.0652
osa-MIR812j	TAAGACGGATGATTAAAGTTGGAC	24	98	175	52	48.0543	51.4912	42.3559
osa-MIR812j	AAGACGGATGATTAAAGTTGGACA	24	3594	5859	1026	1762.32	1723.92	835.715
osa-MIR812j	AAGACGGATGATTAAAGTTGGAC	23	43	184	29	21.085	54.1393	23.6216
osa-MIR812j	AGACGGATGATTAAAGTTGGACAC	24	73	107	16	35.7955	31.4832	13.0326
osa-MIR812j	AGACGGATGATTAAAGTTGGACA	23	32	81	14	15.6912	23.8331	11.4035
osa-MIR812j	AGACGGATGATTAAAGTTGGAC	22	9	42	8	4.41315	12.3579	6.5163
osa-MIR812j	GACGGATGATTAAAGTTGGACACG	24	345	414	45	169.171	121.813	36.6542
osa-MIR812j	GACGGATGATTAAAGTTGGACA	22	10	49	14	4.9035	14.4175	11.4035
osa-MIR812j	ACGGATGATTAAAGTTGGACACGG	24	488	558	65	239.291	164.183	52.9449
osa-MIR812j	ACGGATGATTAAAGTTGGACACGGA	25	33	32	7	16.1815	9.41553	5.70176
osa-MIR812j	GATGATTAAAGTTGGACACGGAAA	24	169	187	17	82.8691	55.022	13.8471
osa-MIR812j	ATGGCTGCGTTTATTTTGTGACGG	24	42	24	9	20.5947	7.06165	7.33083
osa-MIR812k	AAGACGAACGGTTAAAGTTGGACG	24	36	19	8	17.6526	5.59047	6.5163
osa-MIR812k	AGACGAACGGTTAAAGTTGGACGC	24	22	13	10	10.7877	3.82506	8.14537
osa-MIR812k	GAACGGTTAAAGTTGGACGCGGAA	24	32	50	14	15.6912	14.7118	11.4035
osa-MIR812l	AAGACGAACGGTTAAAGTTGGACG	24	36	19	8	17.6526	5.59047	6.5163
osa-MIR812l	AGACGAACGGTTAAAGTTGGACGC	24	22	13	10	10.7877	3.82506	8.14537
osa-MIR812l	GAACGGTTAAAGTTGGACGCGGAA	24	32	50	14	15.6912	14.7118	11.4035
osa-MIR812m	AAGACGAACGGTTAAAGTTGGACG	24	36	19	8	17.6526	5.59047	6.5163
osa-MIR812m	AGACGAACGGTTAAAGTTGGACGC	24	22	13	10	10.7877	3.82506	8.14537
osa-MIR812m	GAACGGTTAAAGTTGGACGCGGAA	24	32	50	14	15.6912	14.7118	11.4035
osa-MIR812n	ACGGAAAATCATGGCTGCACTTAA	24	559	536	157	274.105	157.71	127.882
osa-MIR812n	CGGAAAATCATGGCTGCACTTAAA	24	18	71	9	8.82629	20.8907	7.33083
osa-MIR814c	ACAACGAATCTGGACAGGAAGCAT	24	33	32	11	16.1815	9.41553	8.95991
osa-MIR815a	GGGTGTGTTTGAGGAGAAGGGGAT	24	13	40	2	6.37455	11.7694	1.62907
osa-MIR815a	GTGTTTGAGGAGAAGGGGATTGAG	24	35	18	6	17.1622	5.29623	4.88722
osa-MIR815a	GTTTGAGGAGAAGGGGATTGAGGA	24	23	44	9	11.278	12.9464	7.33083
osa-MIR815a	TGAGGAGAAGGGGATTGAGGAGAT	24	25	46	19	12.2587	13.5348	15.4762
osa-MIR815a	GAGAAGGGGATTGAGGAGATTGGG	24	61	25	5	29.9113	7.35588	4.07269
osa-MIR815a	GAGAAGGGGATTGAGGAGATTGG	23	33	45	7	16.1815	13.2406	5.70176
osa-MIR815a	AGAAGGGGATTGAGGAGATTGGG	23	58	93	15	28.4403	27.3639	12.2181
osa-MIR815b	GAGAAGGGGATTGAGGAGATTGGG	24	61	25	5	29.9113	7.35588	4.07269
osa-MIR815b	GAGAAGGGGATTGAGGAGATTGG	23	33	45	7	16.1815	13.2406	5.70176
osa-MIR815b	AGAAGGGGATTGAGGAGATTGGG	23	58	93	15	28.4403	27.3639	12.2181
osa-MIR815b	AGAAGGGGATTGAGGAGATTGGGA	24	51	30	10	25.0078	8.82706	8.14537
osa-MIR815b	GAAGGGGATTGAGGAGATTGGGAA	24	102	183	39	50.0157	53.8451	31.767
osa-MIR815b	GAAGGGGATTGAGGAGATTGGGA	23	64	138	29	31.3824	40.6045	23.6216
osa-MIR815b	AAGGGGATTGAGGAGATTGGGAAG	24	59	12	11	28.9306	3.53082	8.95991
osa-MIR815b	GGGGATTGAGGAGATTGGGAAGAT	24	152	232	66	74.5332	68.2626	53.7595
osa-MIR815b	GGGGATTGAGGAGATTGGGAAGA	23	111	220	44	54.4288	64.7318	35.8396
osa-MIR815c	GGGTGTGTTTGAGGAGAAGGGGAT	24	13	40	2	6.37455	11.7694	1.62907
osa-MIR815c	GTGTTTGAGGAGAAGGGGATTGAG	24	35	18	6	17.1622	5.29623	4.88722
osa-MIR815c	GTTTGAGGAGAAGGGGATTGAGGA	24	23	44	9	11.278	12.9464	7.33083
osa-MIR815c	TGAGGAGAAGGGGATTGAGGAGAT	24	25	46	19	12.2587	13.5348	15.4762
osa-MIR815c	GAGAAGGGGATTGAGGAGATTGGG	24	61	25	5	29.9113	7.35588	4.07269
osa-MIR815c	GAGAAGGGGATTGAGGAGATTGG	23	33	45	7	16.1815	13.2406	5.70176
osa-MIR815c	AGAAGGGGATTGAGGAGATTGGG	23	58	93	15	28.4403	27.3639	12.2181
osa-MIR815c	AGAAGGGGATTGAGGAGATTGGGA	24	51	30	10	25.0078	8.82706	8.14537
osa-MIR815c	GAAGGGGATTGAGGAGATTGGGAA	24	102	183	39	50.0157	53.8451	31.767
osa-MIR815c	GAAGGGGATTGAGGAGATTGGGA	23	64	138	29	31.3824	40.6045	23.6216
osa-MIR815c	AAGGGGATTGAGGAGATTGGGAAG	24	59	12	11	28.9306	3.53082	8.95991
osa-MIR818d	CCCTTATATTATGGGACGGAGGG	23	4	35	6	1.9614	10.2982	4.88722
osa-MIR818d	CCTTATATTATGGGACGGAGGGAG	24	20	156	21	9.80699	45.9007	17.1053
osa-MIR818d	CTTATATTATGGGACGGAGGGAGT	24	134	256	45	65.7069	75.3242	36.6542
osa-MIR818d	CTTATATTATGGGACGGAGGGAG	23	18	55	3	8.82629	16.1829	2.44361
osa-MIR818d	ATATTATGGGACGGAGGGAGT	21	28	16	4	13.7298	4.70776	3.25815
osa-MIR819a	ATAAGACTTTCTAGCATTGCCCAC	24	80	94	38	39.228	27.6581	30.9524
osa-MIR819a	ATCTATATGAATGTGGGCAATGCT	24	62	70	16	30.4017	20.5965	13.0326
osa-MIR819a	ATCTATATGAATGTGGGCAAT	21	40	42	6	19.614	12.3579	4.88722
osa-MIR819a	ATCTATATGAATGTGGGCAATG	22	25	17	3	12.2587	5.002	2.44361
osa-MIR819a	TCTATATGAATGTGGGCAATG	21	109	48	6	53.4481	14.1233	4.88722
osa-MIR819a	TCTATATGAATGTGGGCAATGCTA	24	86	50	12	42.1701	14.7118	9.77445
osa-MIR819a	TATATGAATGTGGGCAATGCTAGA	24	50	69	9	24.5175	20.3022	7.33083
osa-MIR819a	ATATGAATGTGGGCAATGCTAGAA	24	163	157	39	79.927	46.1949	31.767
osa-MIR819a	ATATGAATGTGGGCAATGCTAGA	23	38	33	8	18.6333	9.70976	6.5163
osa-MIR819a	TATGAATGTGGGCAATGCTAGAAA	24	882	1447	257	432.488	425.758	209.336
osa-MIR819a	TATGAATGTGGGCAATGCTAG	21	73	42	5	35.7955	12.3579	4.07269
osa-MIR819a	TATGAATGTGGGCAATGCTAGAA	23	50	152	24	24.5175	44.7238	19.5489
osa-MIR819a	TATGAATGTGGGCAATGCTAGA	22	27	27	7	13.2394	7.94435	5.70176
osa-MIR819a	ATGAATGTGGGCAATGCTAGAAAG	24	449	378	76	220.167	111.221	61.9048
osa-MIR819a	ATGAATGTGGGCAATGCTAGAAA	23	44	67	19	21.5754	19.7138	15.4762
osa-MIR819a	TGAATGTGGGCAATGCTAGAA	21	93	90	9	45.6025	26.4812	7.33083
osa-MIR819a	TGAATGTGGGCAATGCTAGAAA	22	63	78	1	30.892	22.9503	0.814537
osa-MIR819a	TGAATGTGGGCAATGCTAGAAAGT	24	37	120	18	18.1429	35.3082	14.6617
osa-MIR819a	TGAATGTGGGCAATGCTAGAAAG	23	26	46	5	12.7491	13.5348	4.07269
osa-MIR819a	TGGGCAATGCTAGAAAGTCTTATA	24	24	32	13	11.7684	9.41553	10.589
osa-MIR819a	TGGGCAATGCTAGAAAGTCTT	21	17	40	9	8.33594	11.7694	7.33083
osa-MIR819c	ATAAGACTTTCTAGCATTGCCCAC	24	80	94	38	39.228	27.6581	30.9524
osa-MIR819c	AGATGTTAATGAATCTAGGCACAC	24	30	18	13	14.7105	5.29623	10.589
osa-MIR819c	AATGAATCTAGGCACACATATATG	24	27	17	4	13.2394	5.002	3.25815
osa-MIR819c	TATATGAATGTGGGCAATGCTAGA	24	50	69	9	24.5175	20.3022	7.33083
osa-MIR819c	ATATGAATGTGGGCAATGCTAGAA	24	163	157	39	79.927	46.1949	31.767
osa-MIR819c	ATATGAATGTGGGCAATGCTAGA	23	38	33	8	18.6333	9.70976	6.5163
osa-MIR819c	TATGAATGTGGGCAATGCTAGAAA	24	882	1447	257	432.488	425.758	209.336
osa-MIR819c	TATGAATGTGGGCAATGCTAG	21	73	42	5	35.7955	12.3579	4.07269
osa-MIR819c	TATGAATGTGGGCAATGCTAGAA	23	50	152	24	24.5175	44.7238	19.5489
osa-MIR819c	TATGAATGTGGGCAATGCTAGA	22	27	27	7	13.2394	7.94435	5.70176
osa-MIR819c	ATGAATGTGGGCAATGCTAGAAAG	24	449	378	76	220.167	111.221	61.9048
osa-MIR819c	ATGAATGTGGGCAATGCTAGAAA	23	44	67	19	21.5754	19.7138	15.4762
osa-MIR819c	TGAATGTGGGCAATGCTAGAA	21	93	90	9	45.6025	26.4812	7.33083
osa-MIR819c	TGAATGTGGGCAATGCTAGAAA	22	63	78	1	30.892	22.9503	0.814537
osa-MIR819c	TGAATGTGGGCAATGCTAGAAAG	23	26	46	5	12.7491	13.5348	4.07269
osa-MIR819d	ATAAGACTTTCTAGCATTGCCCAC	24	80	94	38	39.228	27.6581	30.9524
osa-MIR819d	ATCTATATGAATGTGGGCAATGCT	24	62	70	16	30.4017	20.5965	13.0326
osa-MIR819d	ATCTATATGAATGTGGGCAAT	21	40	42	6	19.614	12.3579	4.88722
osa-MIR819d	ATCTATATGAATGTGGGCAATG	22	25	17	3	12.2587	5.002	2.44361
osa-MIR819d	TCTATATGAATGTGGGCAATG	21	109	48	6	53.4481	14.1233	4.88722
osa-MIR819d	TCTATATGAATGTGGGCAATGCTA	24	86	50	12	42.1701	14.7118	9.77445
osa-MIR819d	TATATGAATGTGGGCAATGCTAGA	24	50	69	9	24.5175	20.3022	7.33083
osa-MIR819d	ATATGAATGTGGGCAATGCTAGAA	24	163	157	39	79.927	46.1949	31.767
osa-MIR819d	ATATGAATGTGGGCAATGCTAGA	23	38	33	8	18.6333	9.70976	6.5163
osa-MIR819d	TATGAATGTGGGCAATGCTAGAAA	24	882	1447	257	432.488	425.758	209.336
osa-MIR819d	TATGAATGTGGGCAATGCTAG	21	73	42	5	35.7955	12.3579	4.07269
osa-MIR819d	TATGAATGTGGGCAATGCTAGAA	23	50	152	24	24.5175	44.7238	19.5489
osa-MIR819d	TATGAATGTGGGCAATGCTAGA	22	27	27	7	13.2394	7.94435	5.70176
osa-MIR819d	ATGAATGTGGGCAATGCTAGAAAG	24	449	378	76	220.167	111.221	61.9048
osa-MIR819d	ATGAATGTGGGCAATGCTAGAAA	23	44	67	19	21.5754	19.7138	15.4762
osa-MIR819d	TGAATGTGGGCAATGCTAGAA	21	93	90	9	45.6025	26.4812	7.33083
osa-MIR819d	TGAATGTGGGCAATGCTAGAAA	22	63	78	1	30.892	22.9503	0.814537
osa-MIR819d	TGAATGTGGGCAATGCTAGAAAGT	24	37	120	18	18.1429	35.3082	14.6617
osa-MIR819d	TGAATGTGGGCAATGCTAGAAAG	23	26	46	5	12.7491	13.5348	4.07269
osa-MIR819d	TGGGCAATGCTAGAAAGTCTTATA	24	24	32	13	11.7684	9.41553	10.589
osa-MIR819d	TGGGCAATGCTAGAAAGTCTT	21	17	40	9	8.33594	11.7694	7.33083
osa-MIR819d	AAAGTCTTATAACCTGAAACGGAG	24	61	45	29	29.9113	13.2406	23.6216
osa-MIR819e	ATAAGACTTTCTAGCATTGCCCAC	24	80	94	38	39.228	27.6581	30.9524
osa-MIR819e	AGATGTTAATGAATCTAGGCACAC	24	30	18	13	14.7105	5.29623	10.589
osa-MIR819e	AATGAATCTAGGCACACATATATG	24	27	17	4	13.2394	5.002	3.25815
osa-MIR819e	TATATGAATGTGGGCAATGCTAGA	24	50	69	9	24.5175	20.3022	7.33083
osa-MIR819e	ATATGAATGTGGGCAATGCTAGAA	24	163	157	39	79.927	46.1949	31.767
osa-MIR819e	ATATGAATGTGGGCAATGCTAGA	23	38	33	8	18.6333	9.70976	6.5163
osa-MIR819e	TATGAATGTGGGCAATGCTAGAAA	24	882	1447	257	432.488	425.758	209.336
osa-MIR819e	TATGAATGTGGGCAATGCTAG	21	73	42	5	35.7955	12.3579	4.07269
osa-MIR819e	TATGAATGTGGGCAATGCTAGAA	23	50	152	24	24.5175	44.7238	19.5489
osa-MIR819e	TATGAATGTGGGCAATGCTAGA	22	27	27	7	13.2394	7.94435	5.70176
osa-MIR819e	ATGAATGTGGGCAATGCTAGAAAG	24	449	378	76	220.167	111.221	61.9048
osa-MIR819e	ATGAATGTGGGCAATGCTAGAAA	23	44	67	19	21.5754	19.7138	15.4762
osa-MIR819e	TGAATGTGGGCAATGCTAGAA	21	93	90	9	45.6025	26.4812	7.33083
osa-MIR819e	TGAATGTGGGCAATGCTAGAAA	22	63	78	1	30.892	22.9503	0.814537
osa-MIR819e	TGAATGTGGGCAATGCTAGAAAGT	24	37	120	18	18.1429	35.3082	14.6617
osa-MIR819e	TGAATGTGGGCAATGCTAGAAAG	23	26	46	5	12.7491	13.5348	4.07269
osa-MIR819e	TGGGCAATGCTAGAAAGTCTTATA	24	24	32	13	11.7684	9.41553	10.589
osa-MIR819e	TGGGCAATGCTAGAAAGTCTT	21	17	40	9	8.33594	11.7694	7.33083
osa-MIR819f	ATAAGACTTTCTAGCATTGCCCAC	24	80	94	38	39.228	27.6581	30.9524
osa-MIR819g	ATAAGACTTTCTAGCATTGCCCAC	24	80	94	38	39.228	27.6581	30.9524
osa-MIR819h	ATAAGACTTTCTAGCATTGCCCAC	24	80	94	38	39.228	27.6581	30.9524
osa-MIR819h	AAAGTCTTATAACCTGAAACGGAG	24	61	45	29	29.9113	13.2406	23.6216
osa-MIR819j	AGATGTTAATGAATCTAGGCACAC	24	30	18	13	14.7105	5.29623	10.589
osa-MIR819j	AATGAATCTAGGCACACATATATG	24	27	17	4	13.2394	5.002	3.25815
osa-MIR819j	TATATGAATGTGGGCAATGCTAGA	24	50	69	9	24.5175	20.3022	7.33083
osa-MIR819j	ATATGAATGTGGGCAATGCTAGAA	24	163	157	39	79.927	46.1949	31.767
osa-MIR819j	ATATGAATGTGGGCAATGCTAGA	23	38	33	8	18.6333	9.70976	6.5163
osa-MIR819j	TATGAATGTGGGCAATGCTAGAAA	24	882	1447	257	432.488	425.758	209.336
osa-MIR819j	TATGAATGTGGGCAATGCTAG	21	73	42	5	35.7955	12.3579	4.07269
osa-MIR819j	TATGAATGTGGGCAATGCTAGAA	23	50	152	24	24.5175	44.7238	19.5489
osa-MIR819j	TATGAATGTGGGCAATGCTAGA	22	27	27	7	13.2394	7.94435	5.70176
osa-MIR819j	ATGAATGTGGGCAATGCTAGAAAG	24	449	378	76	220.167	111.221	61.9048
osa-MIR819j	ATGAATGTGGGCAATGCTAGAAA	23	44	67	19	21.5754	19.7138	15.4762
osa-MIR819j	TGAATGTGGGCAATGCTAGAA	21	93	90	9	45.6025	26.4812	7.33083
osa-MIR819j	TGAATGTGGGCAATGCTAGAAA	22	63	78	1	30.892	22.9503	0.814537
osa-MIR819j	TGAATGTGGGCAATGCTAGAAAGT	24	37	120	18	18.1429	35.3082	14.6617
osa-MIR819j	TGAATGTGGGCAATGCTAGAAAG	23	26	46	5	12.7491	13.5348	4.07269
osa-MIR819k	ATAAGACTTTCTAGCATTGCCCAT	24	31	24	14	15.2008	7.06165	11.4035
osa-MIR819k	ATATGAATGTGGACAATGCTAGAA	24	64	39	10	31.3824	11.4752	8.14537
osa-MIR819k	TATGAATGTGGACAATGCTAGAAA	24	95	159	21	46.5832	46.7834	17.1053
osa-MIR819k	ATGAATGTGGACAATGCTAGAAAG	24	27	26	2	13.2394	7.65012	1.62907
osa-MIR819k	TGAATGTGGACAATGCTAGAAA	22	21	18	2	10.2973	5.29623	1.62907
osa-MIR820a	TCGGCCTCGTGGATGGACCAGGAG	24	10865	17471	3487	5327.65	5140.58	2840.29
osa-MIR820a	TCGGCCTCGTGGATGGACCAGGA	23	704	1687	581	345.206	496.375	473.246
osa-MIR820a	TCGGCCTCGTGGATGGACCAGG	22	223	244	62	109.348	71.7934	50.5013
osa-MIR820a	TCGGCCTCGTGGATGGACCAG	21	163	259	123	79.927	76.2069	100.188
osa-MIR820a	TCGGCCTCGTGGATGGACCA	20	3	6	15	1.47105	1.76541	12.2181
osa-MIR820a	CGGCCTCGTGGATGGACCAGGAG	23	26	75	16	12.7491	22.0676	13.0326
osa-MIR820a	GAACTGCCTTAAGGAAGTCGATGCT	25	36	24	9	17.6526	7.06165	7.33083
osa-MIR820a	AACTGCCTTAAGGAAGTCGATGCT	24	149	93	62	73.0621	27.3639	50.5013
osa-MIR820a	AACTGCCTTAAGGAAGTCGATGCTC	25	60	45	30	29.421	13.2406	24.4361
osa-MIR820b	TCGGCCTCGTGGATGGACCAGGAG	24	10865	17471	3487	5327.65	5140.58	2840.29
osa-MIR820b	TCGGCCTCGTGGATGGACCAGGA	23	704	1687	581	345.206	496.375	473.246
osa-MIR820b	TCGGCCTCGTGGATGGACCAGG	22	223	244	62	109.348	71.7934	50.5013
osa-MIR820b	TCGGCCTCGTGGATGGACCAG	21	163	259	123	79.927	76.2069	100.188
osa-MIR820b	TCGGCCTCGTGGATGGACCA	20	3	6	15	1.47105	1.76541	12.2181
osa-MIR820b	CGGCCTCGTGGATGGACCAGGAG	23	26	75	16	12.7491	22.0676	13.0326
osa-MIR820b	AACCTTGTTAAGGTCGGAACGAAC	24	9	39	2	4.41315	11.4752	1.62907
osa-MIR820b	GAACTGCCTTAAGGAAGTCGATGCT	25	36	24	9	17.6526	7.06165	7.33083
osa-MIR820b	AACTGCCTTAAGGAAGTCGATGCT	24	149	93	62	73.0621	27.3639	50.5013
osa-MIR820b	AACTGCCTTAAGGAAGTCGATGCTT	25	21	16	9	10.2973	4.70776	7.33083
osa-MIR820c	TCGGCCTCGTGGATGGACCAGGAG	24	10865	17471	3487	5327.65	5140.58	2840.29
osa-MIR820c	TCGGCCTCGTGGATGGACCAGGA	23	704	1687	581	345.206	496.375	473.246
osa-MIR820c	TCGGCCTCGTGGATGGACCAGG	22	223	244	62	109.348	71.7934	50.5013
osa-MIR820c	TCGGCCTCGTGGATGGACCAG	21	163	259	123	79.927	76.2069	100.188
osa-MIR820c	TCGGCCTCGTGGATGGACCA	20	3	6	15	1.47105	1.76541	12.2181
osa-MIR820c	CGGCCTCGTGGATGGACCAGGAG	23	26	75	16	12.7491	22.0676	13.0326
osa-MIR820c	AACCTTGTTAAGGTCGGAACGAAC	24	9	39	2	4.41315	11.4752	1.62907
osa-MIR820c	GAACTGCCTTAAGGAAGTCGATGCT	25	36	24	9	17.6526	7.06165	7.33083
osa-MIR820c	AACTGCCTTAAGGAAGTCGATGCT	24	149	93	62	73.0621	27.3639	50.5013
osa-MIR820c	AACTGCCTTAAGGAAGTCGATGCTC	25	60	45	30	29.421	13.2406	24.4361
osa-MIR827a	TGGTCATCTAGCTACCCGTGC	21	25	12	8	12.2587	3.53082	6.5163
osa-MIR827a	TTAGATGACCATCAGCAAACA	21	4810	4374	1093	2358.58	1286.99	890.289
osa-MIR827b	TGGTCATCTAGCTACCCGTGC	21	25	12	8	12.2587	3.53082	6.5163
osa-MIR827b	TTAGATGACCATCAGCAAACA	21	4810	4374	1093	2358.58	1286.99	890.289
osa-MIR827b	TTAGATGACCATCAGCAAACAA	22	33	70	10	16.1815	20.5965	8.14537
